# Supplementary material
Source: publisher figshare collection journal article supplement (https://geolsoc.figshare.com/ndownloader/files/28380067)
Supplement: Supplementary file 1 [file 28380067]

## Sheet: Supplementary Table 6
Supplementary Table 6: Bulk carbonate carbon and oxygen isotope ratio, and carbonate content measurements for samples from the Mochras core. SSK (Subsample Keyworth) number identifies sample taken from interval bag. Registered specimen numbers identify bulk samples extracted from rock specimens containing registered fossils. Possible depth range is given in foot and inch and listed depth computed…
sample	SSK	registered	depth max		depth min		depth	CaCO3	Mass spec, Lab	date	δ13C	δ18O
		specimen	ft	inch	ft	inch	m	%		analysis	‰ VPDB	‰ VPDB
CVU_carb_4273	74434		2015	6	2010	6	613.562	44.3901	Sercon 20-22, Penryn	2018-11-12	1.81969	-5.12323
CVU_carb_4274	74435		2020	1	2015	6	615.023	32.7041	Sercon 20-22, Penryn	2018-11-12	1.51989	-5.09504
CVU_carb_2876	74436		2025	0	2020	1	616.471	38.1686	Sercon 20-22, Penryn	2017-05-12	1.84525	-4.93742
CVU_carb_4243	74437		2029	9	2025	0	617.944	47.8164	Sercon 20-22, Penryn	2018-11-12	1.64704	-4.92973
CVU_carb_4275	74438		2039	5	2034	6	620.865	43.1879	Sercon 20-22, Penryn	2018-11-12	1.73451	-4.73513
CVU_carb_4244	74439		2044	3	2039	5	622.351	41.3307	Sercon 20-22, Penryn	2018-11-12	1.63365	-4.75259
CVU_carb_4245	74440		2049	3	2044	3	623.849	35.4596	Sercon 20-22, Penryn	2018-11-12	1.65323	-4.82807
CVU_carb_4246	74441		2054	1	2049	3	625.348	39.2917	Sercon 20-22, Penryn	2018-11-12	1.55003	-4.49524
CVU_carb_2859	74443		2059	2	2054	1	626.859	79.2377	Sercon 20-22, Penryn	2017-05-12	1.04833	-4.61263
CVU_carb_4230	74444		2063	8	2059	2	628.32	36.5	Sercon 20-22, Penryn	2018-10-02	1.51	-4.63
CVU_carb_4276	74445		2068	10	2063	8	629.793	26.1289	Sercon 20-22, Penryn	2018-11-12	1.68358	-4.46257
CVU_carb_4277	74446		2078	6	2073	8	632.79	29.165	Sercon 20-22, Penryn	2018-11-12	1.49537	-4.50811
CVU_carb_4247	74447		2083	3	2078	6	634.251	28.911	Sercon 20-22, Penryn	2018-11-12	1.45063	-4.38647
CVU_carb_4278	74448		2092	7	2087	10	637.096	31.216	Sercon 20-22, Penryn	2018-11-12	1.83032	-4.78103
CVU_carb_4279	74449		2097	3	2092	7	638.531	31.3119	Sercon 20-22, Penryn	2018-11-12	1.53563	-4.85427
CVU_carb_4280	74450		2101	11	2097	3	639.953	32.211	Sercon 20-22, Penryn	2018-11-12	1.32538	-4.65308
CVU_carb_4281	74451		2106	11	2101	11	641.426	20.1934	Sercon 20-22, Penryn	2018-11-12	1.29526	-4.14312
CVU_carb_2864	74452		2111	9	2106	11	642.925	24.1108	Sercon 20-22, Penryn	2017-05-12	1.69801	-4.52238
CVU_carb_4446	74453		2116	2	2111	9	644.335	26.0205	Sercon 20-22, Penryn	2019-02-06	1.40845	-5.04173
CVU_carb_4248	74454		2121	0	2116	2	645.744	28.8177	Sercon 20-22, Penryn	2018-11-12	1.43171	-4.76938
CVU_carb_4249	74455		2125	3	2121	0	647.129	17.3761	Sercon 20-22, Penryn	2018-11-12	1.46303	-4.65169
CVU_carb_4250	74456		2129	9	2125	3	648.462	32.8907	Sercon 20-22, Penryn	2018-11-12	1.4484	-4.89259
CVU_carb_4251	74457		2134	9	2129	9	649.91	28.5409	Sercon 20-22, Penryn	2018-11-12	1.06422	-4.49499
CVU_carb_4252	74458		2153	8	2149	0	655.726	24.0713	Sercon 20-22, Penryn	2018-11-12	0.851771	-4.69097
CVU_carb_4231	74459		2168	2	2163	3	660.108	15.9	Sercon 20-22, Penryn	2018-10-02	1.08	-4.48
CVU_carb_4232	74460		2172	9	2168	2	661.556	19.7	Sercon 20-22, Penryn	2018-10-02	1.16	-4.64
CVU_carb_2877	74461		2187	3	2182	4	665.925	18.2646	Sercon 20-22, Penryn	2017-05-12	1.4801	-4.45931
CVU_carb_4253	74462		2206	3	2201	7	671.754	27.7639	Sercon 20-22, Penryn	2018-11-12	1.64613	-5.43219
CVU_carb_4233	74463		2215	6	2211	2	674.624	31.2867	Sercon 20-22, Penryn	2018-11-12	0.780296	-4.87017
CVU_carb_2713	74464		2239	2	2234	8	681.812	25.3832	Sercon 20-22, Penryn	2017-05-09	1.33408	-5.56041
CVU_carb_2806	74465		2243	9	2239	2	683.197	37.0258	Sercon 20-22, Penryn	2017-05-12	1.17625	-5.77655
CVU_carb_2817	74466		2248	6	2243	9	684.619	30.8639	Sercon 20-22, Penryn	2017-05-12	1.70671	-5.72272
CVU_carb_4234	74467		2266	9	2262	6	690.258	34.7064	Sercon 20-22, Penryn	2018-11-12	1.18735	-5.45615
CVU_carb_2691	74468		2285	8	2281	0	695.96	25.836	Sercon 20-22, Penryn	2017-05-09	1.4724	-5.59749
CVU_carb_4235	74469		2290	3	2285	8	697.37	36.0973	Sercon 20-22, Penryn	2018-11-12	1.55871	-5.23879
CVU_carb_4236	74470		2300	0	2295	2	700.303	22.9757	Sercon 20-22, Penryn	2018-11-12	1.97454	-5.19369
CVU_carb_4254	74471		2318	6	2313	10	705.968	36.558	Sercon 20-22, Penryn	2018-11-12	2.28341	-5.40339
CVU_carb_4255	74472		2345	2	2340	8	714.121	39.8612	Sercon 20-22, Penryn	2018-11-12	2.17238	-5.33457
CVU_carb_4237	74473		2349	10	2345	2	715.518	35.841	Sercon 20-22, Penryn	2018-11-12	2.43608	-5.55711
CVU_carb_4282	74474		2359	5	2354	9	718.439	28.1669	Sercon 20-22, Penryn	2018-11-12	2.19402	-5.12186
CVU_carb_4256	74475		2387	7	2383	1	727.05	33.2046	Sercon 20-22, Penryn	2018-11-12	2.08204	-5.308
CVU_carb_2751	74476		2397	3	2392	3	729.92	45.6182	Sercon 20-22, Penryn	2017-05-12	2.43409	-5.80681
CVU_carb_4238	74477		2411	5	2406	9	734.289	35.5012	Sercon 20-22, Penryn	2018-11-12	2.77721	-5.70096
CVU_carb_2861	74478		2429	9	2425	5	739.927	39.953	Sercon 20-22, Penryn	2017-05-12	2.69898	-5.44369
CVU_carb_2850	74479		2434	5	2429	9	741.299	58.9119	Sercon 20-22, Penryn	2017-05-12	2.76551	-5.88147
CVU_carb_4239	74480		2438	11	2434	6	742.709	35.2596	Sercon 20-22, Penryn	2018-11-12	2.6387	-5.49275
CVU_carb_2789	74481		2444	3	2438	11	744.195	41.2282	Sercon 20-22, Penryn	2017-05-12	2.66376	-5.5952
CVU_carb_2827	74482		2448	10	2444	3	745.706	31.3994	Sercon 20-22, Penryn	2017-05-12	2.51122	-5.04538
CVU_carb_4240	74483		2462	3	2458	6	749.922	40.0961	Sercon 20-22, Penryn	2018-11-12	2.61632	-5.53772
CVU_carb_4241	74484		2466	10	2462	3	751.192	46.2857	Sercon 20-22, Penryn	2018-11-12	2.29085	-5.81215
CVU_carb_2855	74485		2471	6	2466	10	752.602	50.4819	Sercon 20-22, Penryn	2017-05-12	2.65851	-5.63522
CVU_carb_4257	74486		2491	2	2486	2	758.546	31.7321	Sercon 20-22, Penryn	2018-11-12	2.42137	-5.5802
CVU_carb_2775	74487		2529	7	2525	0	770.319	29.1712	Sercon 20-22, Penryn	2017-05-12	2.30348	-5.63899
CVU_carb_4258	74488		2543	7	2538	11	774.573	29.5625	Sercon 20-22, Penryn	2018-11-12	2.33845	-5.34701
CVU_carb_4190	53220		2562	3	2557	8	780.275	29.1	Sercon 20-22, Penryn	2018-10-02	2.09	-4.86
CVU_carb_4188	53219		2566	2	2562	3	781.571	22.8	Sercon 20-22, Penryn	2018-10-02	2.22	-4.82
CVU_carb_4261	53218		2575	3	2570	5	784.2	23.644	Sercon 20-22, Penryn	2018-11-12	-2.23388	-4.80022
CVU_carb_2878	74489		2580	1	2575	3	785.673	22.6155	Sercon 20-22, Penryn	2017-05-12	1.16041	-4.83791
CVU_carb_4191	53216		2584	8	2580	1	787.108	25.4	Sercon 20-22, Penryn	2018-10-02	1.76	-5.35
CVU_carb_4189	53215		2589	3	2584	8	788.505	14.1	Sercon 20-22, Penryn	2018-10-02	1.58	-4.97
CVU_carb_4192	53214		2594	2	2589	3	789.953	20.1	Sercon 20-22, Penryn	2018-10-02	1.84	-5.11
CVU_carb_4193	53213		2598	10	2594	2	791.413	25	Sercon 20-22, Penryn	2018-10-02	2.53	-5.34
CVU_carb_4194	53212		2603	7	2598	10	792.848	35	Sercon 20-22, Penryn	2018-10-02	2.35	-5.24
CVU_carb_4195	53211		2608	3	2603	7	794.283	17.5	Sercon 20-22, Penryn	2018-10-02	2.5	-5.43
CVU_carb_4262	53210		2613	1	2608	3	795.731	19.5759	Sercon 20-22, Penryn	2018-11-12	2.88498	-5.2728
CVU_carb_4196	53209		2617	7	2613	0	797.141	18.1	Sercon 20-22, Penryn	2018-10-02	2.18	-5.56
CVU_carb_4197	53208		2622	3	2617	7	798.551	16.8	Sercon 20-22, Penryn	2018-10-02	1.82	-5.47
CVU_carb_2879	na		2629	8	2629	8	801.522	17.1863	Sercon 20-22, Penryn	2017-05-12	1.53407	-4.849
CVU_carb_4263	53207		2635	6	2631	5	802.678	29.1032	Sercon 20-22, Penryn	2018-11-12	1.86848	-5.40761
CVU_carb_4264	53206		2640	0	2635	6	803.986	9.62156	Sercon 20-22, Penryn	2018-11-12	0.0257448	-6.61512
CVU_carb_4265	53205		2644	11	2640	0	805.421	15.2431	Sercon 20-22, Penryn	2018-11-12	0.870037	-5.65375
CVU_carb_4198	53204		2649	7	2644	11	806.882	21.7	Sercon 20-22, Penryn	2018-10-02	-0.09	-5.11
CVU_carb_4266	53203		2654	4	2649	7	808.317	9.79173	Sercon 20-22, Penryn	2018-11-12	-0.494691	-6.91534
CVU_carb_4267	53202		2658	10	2654	4	809.727	17.5542	Sercon 20-22, Penryn	2018-11-12	0.419325	-5.43871
CVU_carb_4268	53201		2663	10	2658	10	811.174	7.24169	Sercon 20-22, Penryn	2018-11-12	-0.097198	-6.40224
CVU_carb_4199	53200		2668	5	2663	10	812.635	9.4	Sercon 20-22, Penryn	2018-10-02	-3.3	-5.28
CVU_carb_4269	53199		2673	3	2668	5	814.07	8.11308	Sercon 20-22, Penryn	2018-11-12	-8.92233	-3.3297
CVU_carb_2880	74491		2678	0	2673	3	815.531	2.23278	Sercon 20-22, Penryn	2017-05-12	-0.502794	-6.64761
CVU_carb_4200	53197		2682	10	2678	0	816.991	3.3	Sercon 20-22, Penryn	2018-10-02	-4.95	-5.43
CVU_carb_4201	53195		2694	2	2687	6	820.166	3.3	Sercon 20-22, Penryn	2018-10-02	-5.76	-3.81
CVU_carb_4270	53194		2697	0	2692	4	821.334	4.35942	Sercon 20-22, Penryn	2018-11-12	-8.86247	-4.43797
CVU_carb_4271	53193		2701	9	2697	0	822.77	3.12985	Sercon 20-22, Penryn	2018-11-12	-2.07105	-5.04122
CVU_carb_4272	53192		2706	7	2701	9	824.23	1.6609	Sercon 20-22, Penryn	2018-11-12	-1.01384	-3.82206
CVU_carb_4284	53191		2711	3	2706	7	825.678	2.54067	Sercon 20-22, Penryn	2018-11-12	-1.44204	-4.04098
CVU_carb_4202	53190		2716	2	2711	3	827.138	4.6	Sercon 20-22, Penryn	2018-10-02	-0.46	-4.56
CVU_carb_4203	53189		2720	6	2716	3	828.561	35.4	Sercon 20-22, Penryn	2018-10-02
CVU_carb_4285	53188		2725	6	2720	6	829.97	2.32942	Sercon 20-22, Penryn	2018-11-12	-2.72438	-3.44041
CVU_carb_4286	53187		2730	6	2725	6	831.494	6.36543	Sercon 20-22, Penryn	2018-11-12	0.227324	-4.72862
CVU_carb_4204	53186		2735	0	2730	6	832.942	6.9	Sercon 20-22, Penryn	2018-10-02	0.47	-4.82
CVU_carb_2881	53185		2739	9	2735	0	834.352	9.60579	Sercon 20-22, Penryn	2017-05-12	1.16928	-5.04069
CVU_carb_4205	53183		2751	7	2746	9	837.946	7.8	Sercon 20-22, Penryn	2018-10-02	1.71	-4.58
CVU_carb_4287	53182		2756	4	2751	3	839.356	9.58544	Sercon 20-22, Penryn	2018-11-12	1.71636	-4.48314
CVU_carb_4206	53181		2761	5	2756	4	840.905	24.7	Sercon 20-22, Penryn	2018-10-02	0.1	-4.11
CVU_carb_4288	53180		2766	2	2761	5	842.404	12.128	Sercon 20-22, Penryn	2018-11-12	1.81493	-5.12077
CVU_carb_4207	53179		2770	6	2766	2	843.788	13.8	Sercon 20-22, Penryn	2018-10-02	1.62	-4.8
CVU_carb_4289	53178		2775	2	2770	6	845.16	15.5898	Sercon 20-22, Penryn	2018-11-12	1.55435	-4.83377
CVU_carb_4290	53177		2779	6	2775	2	846.531	12.0785	Sercon 20-22, Penryn	2018-11-12	1.48424	-5.03286
CVU_carb_4208	53176		2784	2	2779	6	847.903	9.9	Sercon 20-22, Penryn	2018-10-02	1.4	-5.02
CVU_carb_2882	53175		2788	9	2784	2	849.312	11.0563	Sercon 20-22, Penryn	2017-05-12	1.50396	-4.69007
CVU_carb_4291	53174		2793	1	2788	9	850.671	13.5798	Sercon 20-22, Penryn	2018-11-12	0.932394	-5.15516
CVU_carb_4209	53173		2797	2	2793	1	851.954	10.3	Sercon 20-22, Penryn	2018-10-02	1	-5.33
CVU_carb_4292	53172		2807	6	2802	0	854.888	10.3718	Sercon 20-22, Penryn	2018-11-12	0.0791417	-4.65313
CVU_carb_4283	74544		2812	3	2807	6	856.45	8.24617	Sercon 20-22, Penryn	2018-11-12	0.713253	-4.64596
CVU_carb_2883	74545		2817	0	2812	3	857.898	8.89127	Sercon 20-22, Penryn	2017-05-12	0.881052	-5.2653
CVU_carb_4293	53169		2822	0	2817	0	859.384	16.9035	Sercon 20-22, Penryn	2018-11-12	0.626031	-5.00013
CVU_carb_4294	53168		2826	6	2822	0	860.831	10.1673	Sercon 20-22, Penryn	2018-11-12	0.661733	-5.13553
CVU_carb_4210	53165		2840	1	2835	5	864.946	23.6	Sercon 20-22, Penryn	2018-10-02	0.14	-5.4
CVU_carb_4211	53163		2844	9	2840	1	866.369	40.1	Sercon 20-22, Penryn	2018-10-02	1.12	-4.78
CVU_carb_4304	26478		2849	4	2844	9	867.778	28.1134	Sercon 20-22, Penryn	2018-11-12	1.06409	-4.12798
CVU_carb_2870	74547		2858	10	2854	1	870.649	46.8845	Sercon 20-22, Penryn	2017-05-12	1.3228	-4.88192
CVU_carb_4295	74548		2873	0	2868	1	874.941	21.952	Sercon 20-22, Penryn	2018-11-12	1.23721	-4.22908
CVU_carb_4305	26482		2882	10	2877	11	877.938	24.0553	Sercon 20-22, Penryn	2018-11-12	0.810808	-3.95046
CVU_carb_4259	74549		2892	0	2887	5	880.783	24.462	Sercon 20-22, Penryn	2018-11-12	0.899657	-4.71749
CVU_carb_4212	53712		2896	6	2892	0	882.167	44	Sercon 20-22, Penryn	2018-10-02	1.18	-4.57
CVU_carb_4260	74550		2905	6	2900	9	884.873	49.8594	Sercon 20-22, Penryn	2018-11-12	1.83984	-4.81778
CVU_carb_4306	26483		2910	1	2905	6	886.295	67.1046	Sercon 20-22, Penryn	2018-11-12	1.50631	-4.63236
CVU_carb_4213	53707		2914	11	2910	1	887.73	68.6	Sercon 20-22, Penryn	2018-10-02	1.62	-4.6
CVU_carb_4214	53705		2919	10	2914	11	889.216	42.5	Sercon 20-22, Penryn	2018-10-02	1.78	-4.7
CVU_carb_4215	53704		2924	6	2919	10	890.676	29.7	Sercon 20-22, Penryn	2018-10-02	1.43	-4.29
CVU_carb_4216	53700		2934	1	2929	2	893.559	36.3	Sercon 20-22, Penryn	2018-10-02	1.13	-4.12
CVU_carb_2884	74551		2938	6	2934	1	894.982	37.5517	Sercon 20-22, Penryn	2017-05-12	1.98931	-4.17647
CVU_carb_2884	74551		2938	6	2934	1	894.982	37.3721	Sercon 20-22, Penryn	2017-05-12	1.98652	-4.23611
CVU_carb_4217	53697		2942	11	2938	6	896.328	73.2	Sercon 20-22, Penryn	2018-10-02	1.91	-4.1
CVU_carb_4218	53695		2947	0	2942	11	897.623	74.7	Sercon 20-22, Penryn	2018-10-02	1.93	-3.95
CVU_carb_4219	53693		2951	10	2947	1	898.995	70.7	Sercon 20-22, Penryn	2018-10-02	1.58	-4.3
CVU_carb_4220	53692		2956	8	2951	10	900.455	39.7	Sercon 20-22, Penryn	2018-10-02	1.43	-3.99
CVU_carb_4242	74553		2966	2	2961	5	903.364	32.7496	Sercon 20-22, Penryn	2018-11-12	1.31139	-4.56396
CVU_carb_4221	53689		2971	0	2966	2	904.824	70.6	Sercon 20-22, Penryn	2018-10-02	1.67	-4.27
CVU_carb_4222	53687		2975	7	2971	0	906.259	43.1	Sercon 20-22, Penryn	2018-10-02	1.54	-4.4
CVU_carb_2842	74554		2980	0	2975	7	907.631	74.5839	Sercon 20-22, Penryn	2017-05-12	2.06664	-4.22713
CVU_carb_4223	53682		2989	10	2984	11	910.552	44.9	Sercon 20-22, Penryn	2018-10-02	1.59	-4.52
CVU_carb_4296	74555		2994	3	2989	10	911.974	35.8473	Sercon 20-22, Penryn	2018-11-12	1.88368	-4.08062
CVU_carb_4224	53679		2999	0	2994	3	913.371	39.3	Sercon 20-22, Penryn	2018-10-02	1.75	-4.2
CVU_carb_4225	53669		3003	5	2999	0	914.768	41.1	Sercon 20-22, Penryn	2018-10-02	1.72	-3.57
CVU_carb_4226	53668		3008	1	3003	5	916.153	36.1	Sercon 20-22, Penryn	2018-10-02	2.06	-3.33
CVU_carb_4227	53663		3026	8	3022	2	921.842	78.8	Sercon 20-22, Penryn	2018-10-02	2.79	-1.61
CVU_carb_2830	74557		3036	5	3031	8	924.776	84.6003	Sercon 20-22, Penryn	2017-05-12	-3.05085	-0.990929
CVU_carb_2875	74558		3059	6	3054	8	931.799	78.1587	Sercon 20-22, Penryn	2017-05-12	3.51753	-3.48169
CVU_carb_2834	74559		3064	1	3059	6	933.234	67.0635	Sercon 20-22, Penryn	2017-05-12	3.46982	-4.13328
CVU_carb_2797	74560		3073	1	3068	6	935.977	84.3608	Sercon 20-22, Penryn	2017-05-12	3.72707	-2.48688
CVU_carb_2868	74561		3082	4	3077	10	938.809	78.676	Sercon 20-22, Penryn	2017-05-12	3.80303	-4.57328
CVU_carb_4334	78722		3086	9	3082	4	940.168	52.6343	Sercon 20-22, Penryn	2019-01-22	3.09114	-4.61107
CVU_carb_4155	78724		3095	8	3091	4	942.899	53.8	Sercon 20-22, Penryn	2018-10-02	3.43	-4.19
CVU_carb_2846	74562		3095	9	3091	4	942.912	60.28	Sercon 20-22, Penryn	2017-05-12	3.4697	-4.16763
CVU_carb_4228	53645		3100	2	3095	9	944.258	33.8	Sercon 20-22, Penryn	2018-10-02	2.67	-4.64
CVU_carb_4335	78725		3114	6	3109	7	948.55	60.5241	Sercon 20-22, Penryn	2019-01-22	3.75492	-4.26857
CVU_carb_4229	53640		3119	4	3114	6	950.036	32.9	Sercon 20-22, Penryn	2018-10-02	3.26	-4.67
CVU_carb_2838	74564		3124	1	3119	4	951.497	75.986	Sercon 20-22, Penryn	2017-05-12	3.52001	-4.4694
CVU_carb_4169	78727		3124	1	3119	4	951.497	76.6	Sercon 20-22, Penryn	2018-10-02	3.43	-4.64
CVU_carb_4307	78726		3124	1	3119	4	951.497	21.4886	Sercon 20-22, Penryn	2018-11-12	3.01167	-4.92168
CVU_carb_4336	78728		3138	4	3133	6	955.827	66.675	Sercon 20-22, Penryn	2019-01-22	4.07011	-4.28849
CVU_carb_2747	74565		3143	0	3138	4	957.275	46.8583	Sercon 20-22, Penryn	2017-05-12	3.08829	-4.64939
CVU_carb_2771	74566		3146	11	3143	0	958.583	77.4586	Sercon 20-22, Penryn	2017-05-12	3.54703	-5.15416
CVU_carb_4123	78729		3146	11	3143	0	958.583	73.9868	Sercon 20-22, Penryn	2018-09-07	3.77386	-4.73419
CVU_carb_2702	74567		3153	0	3147	0	960.12	70.208	Sercon 20-22, Penryn	2017-05-09	3.76676	-4.8711
CVU_carb_2793	74568		3157	10	3153	0	961.771	76.1392	Sercon 20-22, Penryn	2017-05-12	3.66453	-5.00343
CVU_carb_2709	74569		3162	7	3157	10	963.232	48.1155	Sercon 20-22, Penryn	2017-05-09	3.60819	-4.50361
CVU_carb_4127	78730		3162	7	3157	10	963.232	52.3011	Sercon 20-22, Penryn	2018-09-07	3.79975	-4.79157
CVU_carb_2734	74570		3166	6	3162	7	964.552	63.9846	Sercon 20-22, Penryn	2017-05-12	3.85631	-4.58747
CVU_carb_2743	74571		3170	0	3166	6	965.683	72.366	Sercon 20-22, Penryn	2017-05-12	3.20183	-5.93472
CVU_carb_2762	74572		3174	0	3170	0	966.826	44.0949	Sercon 20-22, Penryn	2017-05-12	3.39076	-4.6513
CVU_carb_2727	74573		3178	6	3174	0	968.121	73.8045	Sercon 20-22, Penryn	2017-05-09	3.20305	-4.74985
CVU_carb_4297	74574		3187	5	3182	10	970.826	67.6668	Sercon 20-22, Penryn	2018-11-12	3.62899	-4.28353
CVU_carb_4298	74575		3200	6	3196	2	974.852	58.6818	Sercon 20-22, Penryn	2018-11-12	3.24776	-4.52826
CVU_carb_4183	78734		3209	4	3204	11	977.532	52.6	Sercon 20-22, Penryn	2018-10-02	3.15	-4.78
CVU_carb_2810	74577		3218	2	3213	8	980.211	46.438	Sercon 20-22, Penryn	2017-05-12	2.83798	-4.68039
CVU_carb_2738	74578		3222	6	3218	2	981.558	34.7696	Sercon 20-22, Penryn	2017-05-12	2.56105	-4.93667
CVU_carb_4143	78737		3232	0	3227	4	984.402	63.3519	Sercon 20-22, Penryn	2018-09-07	3.01514	-4.77813
CVU_carb_2720	74579		3245	8	3241	3	988.606	50.4719	Sercon 20-22, Penryn	2017-05-09	2.53621	-5.04714
CVU_carb_4151	78739		3245	8	3241	3	988.606	47.8631	Sercon 20-22, Penryn	2018-09-07	2.56892	-5.02978
CVU_carb_2872	74580		3250	6	3245	8	990.016	47.8511	Sercon 20-22, Penryn	2017-05-12	2.75953	-4.66262
CVU_carb_2755	74581		3255	4	3250	6	991.489	58.6119	Sercon 20-22, Penryn	2017-05-12	2.75183	-4.97553
CVU_carb_4135	78740		3255	4	3250	6	991.489	68.5431	Sercon 20-22, Penryn	2018-09-07	2.74435	-4.77943
CVU_carb_2781	74582		3264	0	3259	8	994.207	37.3091	Sercon 20-22, Penryn	2017-05-12	2.75218	-5.07832
CVU_carb_2785	74583		3268	7	3264	0	995.566	67.9056	Sercon 20-22, Penryn	2017-05-12	2.61699	-5.18614
CVU_carb_4139	78742		3268	7	3264	0	995.566	64.9794	Sercon 20-22, Penryn	2018-09-07	2.79966	-4.72719
CVU_carb_2801	74584		3277	8	3273	2	998.347	59.8641	Sercon 20-22, Penryn	2017-05-12	2.86026	-4.76721
CVU_carb_4107	78744		3277	8	3273	2	998.347	66.2998	Sercon 20-22, Penryn	2018-09-07	2.7555	-4.79015
CVU_carb_2821	74585		3282	3	3277	8	999.731	40.4119	Sercon 20-22, Penryn	2017-05-12	2.69216	-4.61807
CVU_carb_4187	78746		3301	10	3297	3	1005.7	56	Sercon 20-22, Penryn	2018-10-02	2.29	-4.94
CVU_carb_4337	78747		3311	6	3306	10	1008.63	64.4404	Sercon 20-22, Penryn	2019-01-22	2.42164	-4.97865
CVU_carb_4299	74586		3316	5	3311	6	1010.09	54.0582	Sercon 20-22, Penryn	2018-11-12	2.13885	-4.9473
CVU_carb_4300	74587		3321	0	3316	5	1011.54	43.5211	Sercon 20-22, Penryn	2018-11-12	2.06639	-4.58405
CVU_carb_4338	78749		3330	4	3325	6	1014.35	34.0085	Sercon 20-22, Penryn	2019-01-22	1.89622	-4.76969
CVU_carb_2695	74588		3334	10	3330	4	1015.77	53.8553	Sercon 20-22, Penryn	2017-05-09	2.00654	-4.82556
CVU_carb_4339	78752		3339	4	3334	10	1017.14	43.6523	Sercon 20-22, Penryn	2019-01-22	2.14627	-4.76356
CVU_carb_4301	74589		3343	10	3339	4	1018.51	31.9884	Sercon 20-22, Penryn	2018-11-12	1.96795	-4.91576
CVU_carb_4302	74590		3348	7	3343	10	1019.92	50.3545	Sercon 20-22, Penryn	2018-11-12	2.01083	-5.06742
CVU_carb_4340	78756		3353	6	3348	7	1021.4	26.6306	Sercon 20-22, Penryn	2019-01-22	1.83879	-4.69271
CVU_carb_4341	78758		3358	3	3353	7	1022.88	39.4523	Sercon 20-22, Penryn	2019-01-22	2.01707	-4.87959
CVU_carb_4303	74591		3362	9	3358	3	1024.28	15.3683	Sercon 20-22, Penryn	2018-11-12	1.99147	-5.05902
CVU_carb_4342	78760		3367	4	3362	9	1025.66	14.7215	Sercon 20-22, Penryn	2019-01-22	2.26924	-4.57627
CVU_carb_4343	78761		3372	0	3367	4	1027.07	23.9698	Sercon 20-22, Penryn	2019-01-22	2.1511	-4.30268
CVU_carb_4344	78763		3376	8	3372	0	1028.5	38.203	Sercon 20-22, Penryn	2019-01-22	1.89935	-4.70324
CVU_carb_4345	78764		3381	2	3376	8	1029.89	39.6892	Sercon 20-22, Penryn	2019-01-22	1.9789	-4.93799
CVU_carb_4346	78765		3385	8	3381	2	1031.27	36.396	Sercon 20-22, Penryn	2019-01-22	2.01411	-5.18575
CVU_carb_4347	78766		3390	4	3385	8	1032.66	26.5976	Sercon 20-22, Penryn	2019-01-22	2.06885	-5.16535
CVU_carb_4348	78767		3394	10	3390	4	1034.06	42.6557	Sercon 20-22, Penryn	2019-01-22	2.17605	-5.13364
CVU_carb_4349	78768		3399	6	3394	10	1035.46	27.8706	Sercon 20-22, Penryn	2019-01-22	2.12658	-5.01429
CVU_carb_4308	78769		3403	10	3408	3	1038.16	58.0314	Sercon 20-22, Penryn	2018-11-12	2.22694	-5.1574
CVU_carb_4131	78771		3416	9	3412	8	1040.8	17.9272	Sercon 20-22, Penryn	2018-09-07	1.59015	-4.62666
CVU_carb_4350	78774		3421	1	3416	9	1042.09	34.4831	Sercon 20-22, Penryn	2019-01-22	1.86661	-4.8522
CVU_carb_4351	78775		3425	7	3421	1	1043.43	37.6658	Sercon 20-22, Penryn	2019-01-22	2.5738	-4.79812
CVU_carb_4352	78776		3453	6	3448	10	1051.92	28.7985	Sercon 20-22, Penryn	2019-01-22	3.04794	-4.63649
CVU_carb_4353	78777		3462	9	3458	0	1054.72	55.0271	Sercon 20-22, Penryn	2019-01-22	3.37526	-4.59551
CVU_carb_4354	78778		3471	9	3467	4	1057.52	58.4094	Sercon 20-22, Penryn	2019-01-22	2.87922	-4.93253
CVU_carb_4355	78779		3476	4	3471	9	1058.89	61.6821	Sercon 20-22, Penryn	2019-01-22	3.04746	-4.73716
CVU_carb_4356	78780		3489	8	3485	4	1062.99	53.0313	Sercon 20-22, Penryn	2019-01-22	3.26448	-4.62218
CVU_carb_4357	78781		3499	2	3494	6	1065.83	60.6428	Sercon 20-22, Penryn	2019-01-22	3.29405	-4.49844
CVU_carb_4358	78782		3521	4	3516	6	1072.57	28.0019	Sercon 20-22, Penryn	2019-01-22	3.02849	-4.35378
CVU_carb_4359	78783		3526	1	3521	4	1074.03	28.1434	Sercon 20-22, Penryn	2019-01-22	2.61811	-3.97168
CVU_carb_4360	78784		3530	4	3526	1	1075.4	69.9467	Sercon 20-22, Penryn	2019-01-22	2.98288	-4.73546
CVU_carb_4361	78785		3534	8	3530	4	1076.71	50.3007	Sercon 20-22, Penryn	2019-01-25	3.51758	-4.6965
CVU_carb_4362	78786		3544	1	3539	3	1079.5	74.5186	Sercon 20-22, Penryn	2019-01-25	3.57729	-4.04331
CVU_carb_4363	78787		3548	4	3544	1	1080.88	62.1142	Sercon 20-22, Penryn	2019-01-25	3.31635	-4.91011
CVU_carb_4364	78788		3553	3	3548	4	1082.28	44.3056	Sercon 20-22, Penryn	2019-01-25	3.07377	-4.76636
CVU_carb_4365	78789		3558	0	3553	3	1083.75	48.8338	Sercon 20-22, Penryn	2019-01-25	3.3923	-4.76404
CVU_carb_4366	78790		3562	6	3558	0	1085.16	40.1912	Sercon 20-22, Penryn	2019-01-25	2.98395	-4.48074
CVU_carb_4329	78792		3567	0	3562	6	1086.54	49.6768	Sercon 20-22, Penryn	2019-01-22	3.32014	-4.31558
CVU_carb_4367	78793		3571	9	3567	0	1087.95	29.2098	Sercon 20-22, Penryn	2019-01-25	2.96619	-4.04277
CVU_carb_4368	78794		3576	2	3571	9	1089.34	29.5263	Sercon 20-22, Penryn	2019-01-25	3.09478	-3.75213
CVU_carb_4369	78796		3599	3	3594	7	1096.34	71.6104	Sercon 20-22, Penryn	2019-01-25	3.13989	-4.10783
CVU_carb_4315	78797		3603	8	3599	3	1097.72	50.7997	Sercon 20-22, Penryn	2019-01-22	3.1411	-4.01109
CVU_carb_4370	78798		3612	0	3607	6	1100.25	60.5799	Sercon 20-22, Penryn	2019-01-25	3.04722	-4.66636
CVU_carb_4371	78799		3617	0	3612	0	1101.7	52.5242	Sercon 20-22, Penryn	2019-01-25	3.13207	-4.56379
CVU_carb_4372	78801		3625	8	3620	5	1104.3	67.8771	Sercon 20-22, Penryn	2019-01-25	3.02988	-4.07862
CVU_carb_4373	78802		3630	3	3625	8	1105.8	41.226	Sercon 20-22, Penryn	2019-01-25	2.70994	-4.24691
CVU_carb_4374	78803		3634	10	3630	3	1107.2	46.9058	Sercon 20-22, Penryn	2019-01-25	2.93973	-4.78372
CVU_carb_4375	78804		3639	0	3634	10	1108.53	48.4093	Sercon 20-22, Penryn	2019-01-25	2.81313	-4.52604
CVU_carb_4325	78805		3643	6	3639	0	1109.85	49.3608	Sercon 20-22, Penryn	2019-01-22	2.86917	-4.50576
CVU_carb_4376	78807		3648	0	3643	6	1111.22	65.3114	Sercon 20-22, Penryn	2019-01-25	2.72297	-4.45465
CVU_carb_4377	78808		3652	4	3648	0	1112.57	55.0009	Sercon 20-22, Penryn	2019-01-25	2.58138	-4.10109
CVU_carb_4378	78809		3657	0	3652	4	1113.94	49.4015	Sercon 20-22, Penryn	2019-01-25	2.83755	-4.15375
CVU_carb_4379	78810		3670	7	3666	3	1118.13	54.5451	Sercon 20-22, Penryn	2019-01-25	2.65895	-4.47266
CVU_carb_4504	78811		3688	1	3683	9	1123.47	61.6034	Sercon 20-22, Penryn	2019-02-06	2.57531	-4.7637
CVU_carb_4380	78812		3692	8	3688	1	1124.83	56.5636	Sercon 20-22, Penryn	2019-01-25	2.53167	-4.45628
CVU_carb_4381	78813		3697	1	3692	8	1126.2	64.9236	Sercon 20-22, Penryn	2019-01-25	2.62633	-4.53316
CVU_carb_4505	78814		3714	4	3709	9	1131.43	64.7642	Sercon 20-22, Penryn	2019-02-06	2.68345	-4.38483
CVU_carb_4382	78815		3719	0	3714	4	1132.84	68.5289	Sercon 20-22, Penryn	2019-01-25	2.70177	-4.31242
CVU_carb_4383	78816		3731	8	3727	6	1136.78	69.5206	Sercon 20-22, Penryn	2019-01-25	2.75045	-4.52394
CVU_carb_4384	78817		3740	2	3735	9	1139.33	68.5258	Sercon 20-22, Penryn	2019-01-25	2.89265	-4.08798
CVU_carb_4506	78818		3753	2	3748	10	1143.3	43.3638	Sercon 20-22, Penryn	2019-02-06	2.41761	-3.93935
CVU_carb_4385	78819		3757	4	3753	2	1144.6	42.3178	Sercon 20-22, Penryn	2019-01-25	2.56284	-4.072
CVU_carb_4387	78821		3766	4	3762	0	1147.32	74.0699	Sercon 20-22, Penryn	2019-01-25	2.57716	-3.8345
CVU_carb_4388	78822		3770	6	3766	4	1148.61	42.1128	Sercon 20-22, Penryn	2019-01-25	1.69077	-3.84067
CVU_carb_4314	78824		3775	4	3770	6	1149.99	61.6786	Sercon 20-22, Penryn	2019-01-22	2.27892	-4.71922
CVU_carb_4324	78826		3784	1	3779	3	1152.65	72.845	Sercon 20-22, Penryn	2019-01-22	2.5401	-4.28604
CVU_carb_4386	78820		3807	2	3802	5	1159.7	50.1067	Sercon 20-22, Penryn	2019-01-25	2.27432	-4.46552
CVU_carb_4389	78827		3812	2	3807	2	1161.19	79.4505	Sercon 20-22, Penryn	2019-01-25	2.64679	-3.94262
CVU_carb_4390	78828		3816	11	3812	2	1162.67	58.7299	Sercon 20-22, Penryn	2019-01-25	2.19094	-4.25124
CVU_carb_4323	78830		3821	4	3816	11	1164.07	67.008	Sercon 20-22, Penryn	2019-01-22	2.37608	-3.87514
CVU_carb_4115	78831		3832	11	3830	0	1167.83	66.3175	Sercon 20-22, Penryn	2018-09-07	1.91372	-4.86124
CVU_carb_4391	78832		3835	8	3832	11	1168.69	79.0489	Sercon 20-22, Penryn	2019-01-25	2.44483	-3.36509
CVU_carb_4392	78833		3841	7	3836	8	1170.17	65.2026	Sercon 20-22, Penryn	2019-01-25	2.52115	-4.6875
CVU_carb_4393	78834		3846	0	3841	7	1171.59	44.2596	Sercon 20-22, Penryn	2019-01-25	2.33288	-4.45161
CVU_carb_4103	78836		3851	0	3846	0	1173.02	72.8882	Sercon 20-22, Penryn	2018-09-07	2.54085	-4.5548
CVU_carb_4394	78837		3855	4	3851	0	1174.45	67.0029	Sercon 20-22, Penryn	2019-01-25	2.64128	-4.54406
CVU_carb_4395	78838		3859	11	3855	4	1175.8	70.1934	Sercon 20-22, Penryn	2019-01-25	2.68336	-4.33224
CVU_carb_4328	78840		3864	2	3859	11	1177.15	66.4294	Sercon 20-22, Penryn	2019-01-22	2.58546	-4.21472
CVU_carb_4396	78841		3873	4	3868	10	1179.91	48.8689	Sercon 20-22, Penryn	2019-01-25	2.21663	-4.06265
CVU_carb_4397	78842		3882	6	3877	11	1182.69	50.9338	Sercon 20-22, Penryn	2019-01-25	2.19143	-3.98144
CVU_carb_4398	78843		3887	3	3882	6	1184.11	68.1376	Sercon 20-22, Penryn	2019-01-25	2.51272	-4.00526
CVU_carb_4399	78844		3891	10	3887	3	1185.53	46.7859	Sercon 20-22, Penryn	2019-01-25	2.00477	-4.19774
CVU_carb_4400	78845		3896	6	3891	10	1186.94	46.6203	Sercon 20-22, Penryn	2019-01-25	1.99478	-3.82451
CVU_carb_4401	78846		3901	2	3896	6	1188.36	56.1186	Sercon 20-22, Penryn	2019-01-25	1.96809	-3.98487
CVU_carb_4402	78847		3905	10	3901	2	1189.79	43.2064	Sercon 20-22, Penryn	2019-01-25	1.66625	-3.7016
CVU_carb_4403	78848		3920	4	3915	7	1194.19	47.5216	Sercon 20-22, Penryn	2019-01-25	1.67752	-3.96621
CVU_carb_4404	78849		3929	6	3925	0	1197.03	68.2539	Sercon 20-22, Penryn	2019-01-25	1.8715	-4.17197
CVU_carb_4405	78850		3943	4	3938	10	1201.24	33.6086	Sercon 20-22, Penryn	2019-01-25	1.57649	-3.9389
CVU_carb_4406	78851		3948	2	3943	4	1202.66	58.4142	Sercon 20-22, Penryn	2019-01-25	1.54544	-4.22982
CVU_carb_4407	78853		3952	10	3948	2	1204.11	56.6293	Sercon 20-22, Penryn	2019-01-25	1.70072	-3.87034
CVU_carb_4408	78854		3957	8	3952	10	1205.56	67.2869	Sercon 20-22, Penryn	2019-01-25	1.57155	-4.21126
CVU_carb_4316	78855		3962	8	3957	8	1207.06	67.6899	Sercon 20-22, Penryn	2019-01-22	1.80491	-3.86365
CVU_carb_4409	78856		3967	5	3962	8	1208.54	48.9804	Sercon 20-22, Penryn	2019-01-25	1.65232	-3.64724
CVU_carb_4410	78857		3976	8	3971	11	1211.36	62.6917	Sercon 20-22, Penryn	2019-01-25	1.44308	-4.15714
CVU_carb_4411	78858		3981	6	3976	8	1212.82	59.0881	Sercon 20-22, Penryn	2019-01-25	1.52755	-3.79416
CVU_carb_4412	78859		3986	4	3981	6	1214.3	75.9942	Sercon 20-22, Penryn	2019-01-25	1.91531	-3.70879
CVU_carb_4413	78860		3991	1	3986	4	1215.76	50.3776	Sercon 20-22, Penryn	2019-01-25	1.80127	-3.23396
CVU_carb_4313	78862		3995	10	3991	1	1217.21	53.0256	Sercon 20-22, Penryn	2019-01-22	1.47064	-3.53852
CVU_carb_4414	78863		4000	4	3995	10	1218.62	34.3852	Sercon 20-22, Penryn	2019-01-25	1.13654	-3.94615
CVU_carb_4989	111261		4005	2	4000	4	1220.04	42.3865	Sercon 20-22, Penryn	2020-01-03	0.834569	-4.21235
CVU_carb_4310	78865		4010	0	4005	2	1221.51	42.9889	Sercon 20-22, Penryn	2019-01-22	1.30831	-3.73444
CVU_carb_4415	78866		4014	6	4010	0	1222.93	35.4977	Sercon 20-22, Penryn	2019-01-25	0.804908	-3.6193
CVU_carb_4416	78868		4019	4	4014	6	1224.36	20.8575	Sercon 20-22, Penryn	2019-01-25	0.128017	-3.67545
CVU_carb_4417	78869		4024	1	4019	4	1225.82	38.5643	Sercon 20-22, Penryn	2019-01-25	1.25865	-3.80635
CVU_carb_4418	78870		4029	0	4024	1	1227.29	35.189	Sercon 20-22, Penryn	2019-01-25	1.09906	-3.32557
CVU_carb_4320	78871		4033	8	4029	0	1228.75	22.2886	Sercon 20-22, Penryn	2019-01-22	0.975602	-4.10021
CVU_carb_4419	78872		4038	6	4033	8	1230.2	27.9371	Sercon 20-22, Penryn	2019-01-25	0.265616	-3.81811
CVU_carb_4420	78873		4043	8	4038	6	1231.72	15.4528	Sercon 20-22, Penryn	2019-01-25	0.484556	-3.6092
CVU_carb_4421	78875		4048	5	4043	8	1233.23	13.8304	Sercon 20-22, Penryn	2019-01-25	0.23453	-3.74576
CVU_carb_4990	111262		4053	3	4048	5	1234.69	60.213	Sercon 20-22, Penryn	2020-01-03	1.76561	-3.56248
CVU_carb_4312	78876		4058	1	4053	3	1236.17	67.7896	Sercon 20-22, Penryn	2019-01-22	1.94336	-3.898
CVU_carb_4422	78877		4062	8	4058	1	1237.6	52.7345	Sercon 20-22, Penryn	2019-01-25	2.0203	-4.11432
CVU_carb_4423	78878		4067	4	4062	8	1239.01	44.4675	Sercon 20-22, Penryn	2019-01-25	1.96935	-3.62136
CVU_carb_4424	78879		4071	11	4067	4	1240.42	22.7389	Sercon 20-22, Penryn	2019-01-25	1.5723	-3.57239
CVU_carb_4425	78880		4076	7	4071	11	1241.83	83.6673	Sercon 20-22, Penryn	2019-01-25	2.39324	-2.87525
CVU_carb_4426	78881		4081	0	4076	7	1243.22	53.7048	Sercon 20-22, Penryn	2019-01-25	2.32721	-3.60281
CVU_carb_4991	111263		4085	9	4081	0	1244.61	41.2437	Sercon 20-22, Penryn	2020-01-03	1.78088	-3.92726
CVU_carb_4992	111264		4090	4	4085	9	1246.04	36.2102	Sercon 20-22, Penryn	2020-01-03	1.51411	-3.94443
CVU_carb_4427	78882		4095	0	4090	4	1247.44	26.2587	Sercon 20-22, Penryn	2019-01-25	1.40125	-3.79183
CVU_carb_4428	78884		4099	8	4095	0	1248.87	10.4005	Sercon 20-22, Penryn	2019-01-25	1.3128	-4.00401
CVU_carb_4604	78885		4104	5	4099	8	1250.3	41.9262	Sercon 20-22, Penryn	2019-02-13	2.3394	-3.96385
CVU_carb_4993	111265		4109	0	4104	6	1251.74	30.1927	Sercon 20-22, Penryn	2020-01-03	1.02022	-4.01929
CVU_carb_4994	111266		4113	9	4109	0	1253.15	20.9313	Sercon 20-22, Penryn	2020-01-03	0.980126	-3.61885
CVU_carb_4995	111267		4118	8	4113	9	1254.62	57.8142	Sercon 20-22, Penryn	2020-01-03	2.36348	-3.86655
CVU_carb_4429	78886		4123	3	4118	8	1256.07	47.9023	Sercon 20-22, Penryn	2019-01-25	2.44869	-4.0109
CVU_carb_4430	78887		4127	6	4123	3	1257.41	36.1003	Sercon 20-22, Penryn	2019-01-25	2.26136	-4.41557
CVU_carb_4996	111268		4132	3	4127	6	1258.79	64.7665	Sercon 20-22, Penryn	2020-01-03	2.23727	-4.00823
CVU_carb_4431	78889		4136	8	4132	3	1260.18	43.5053	Sercon 20-22, Penryn	2019-01-25	2.89386	-4.12141
CVU_carb_4432	78891		4141	8	4136	8	1261.62	45.0465	Sercon 20-22, Penryn	2019-01-25	3.03527	-3.71888
CVU_carb_4433	78892		4145	11	4141	8	1263.03	54.3019	Sercon 20-22, Penryn	2019-01-25	2.39979	-4.00853
CVU_carb_4997	111269		4150	7	4145	11	1264.39	56.7108	Sercon 20-22, Penryn	2020-01-03	2.10505	-4.30082
CVU_carb_4507	78894		4155	5	4150	7	1265.83	50.9124	Sercon 20-22, Penryn	2019-02-06	2.40233	-4.30527
CVU_carb_4998	111270		4160	0	4155	5	1267.27	24.5142	Sercon 20-22, Penryn	2020-01-03	2.336	-4.11966
CVU_carb_4434	78895		4164	4	4160	0	1268.63	57.0153	Sercon 20-22, Penryn	2019-01-25	2.81046	-4.47754
CVU_carb_4999	111271		4168	8	4164	4	1269.95	35.6567	Sercon 20-22, Penryn	2020-01-05	2.17599	-3.94746
CVU_carb_4508	78898		4173	2	4168	8	1271.3	57.4972	Sercon 20-22, Penryn	2019-02-06	2.18376	-4.0861
CVU_carb_5000	111272		4178	1	4173	2	1272.73	32.3457	Sercon 20-22, Penryn	2020-01-05	2.0988	-4.40152
CVU_carb_4509	78900		4182	9	4178	2	1274.2	40.2224	Sercon 20-22, Penryn	2019-02-06	2.06654	-4.08856
CVU_carb_4510	78901		4187	4	4182	9	1275.6	39.8901	Sercon 20-22, Penryn	2019-02-06	1.99477	-4.12621
CVU_carb_4435	78903		4192	0	4187	4	1277.01	31.3002	Sercon 20-22, Penryn	2019-01-25	1.85546	-3.83347
CVU_carb_4436	78904		4192	0	4187	4	1277.01	34.9783	Sercon 20-22, Penryn	2019-01-25	1.99723	-3.74832
CVU_carb_4511	78905		4196	9	4192	0	1278.45	18.984	Sercon 20-22, Penryn	2019-02-06	1.35059	-3.59191
CVU_carb_4317	78906		4201	2	4196	9	1279.84	39.197	Sercon 20-22, Penryn	2019-01-22	1.99175	-3.62529
CVU_carb_5001	111273		4206	0	4201	0	1281.23	29.1597	Sercon 20-22, Penryn	2020-01-05	1.40359	-4.09797
CVU_carb_5002	111274		4210	9	4206	0	1282.71	20.4487	Sercon 20-22, Penryn	2020-01-05	0.857529	-3.99521
CVU_carb_4512	78907		4215	4	4210	9	1284.14	41.956	Sercon 20-22, Penryn	2019-02-06	1.89279	-3.95976
CVU_carb_4179	78909		4220	0	4215	4	1285.54	36.1	Sercon 20-22, Penryn	2018-10-02	1.81	-4.19
CVU_carb_4513	78911		4224	9	4220	0	1286.98	39.9895	Sercon 20-22, Penryn	2019-02-06	1.50591	-4.56968
CVU_carb_5003	111275		4229	6	4224	9	1288.43	34.1255	Sercon 20-22, Penryn	2020-01-05	1.67049	-4.14005
CVU_carb_4319	78912		4233	8	4229	6	1289.79	32.3467	Sercon 20-22, Penryn	2019-01-22	1.93658	-4.06236
CVU_carb_4437	78913		4238	7	4233	8	1291.17	38.9274	Sercon 20-22, Penryn	2019-01-25	0.700957	-3.77312
CVU_carb_5004	111276		4243	3	4238	7	1292.63	39.025	Sercon 20-22, Penryn	2020-01-05	1.11798	-3.89464
CVU_carb_4438	78915		4248	1	4243	3	1294.08	42.3974	Sercon 20-22, Penryn	2019-01-25	1.25914	-4.08995
CVU_carb_5005	111277		4248	1	4243	3	1294.08	41.7158	Sercon 20-22, Penryn	2020-01-05	1.2254	-3.92296
CVU_carb_4514	78917		4252	9	4248	11	1295.65	39.4475	Sercon 20-22, Penryn	2019-02-06	1.31125	-3.99447
CVU_carb_4605	78918		4257	5	4252	9	1296.95	35.634	Sercon 20-22, Penryn	2019-02-13	1.02171	-3.51921
CVU_carb_4606	78919		4262	1	4257	5	1298.37	29.2698	Sercon 20-22, Penryn	2019-02-13	0.732853	-3.99457
CVU_carb_5006	111278		4262	1	4257	5	1298.37	27.8568	Sercon 20-22, Penryn	2020-01-05	0.922291	-3.96828
CVU_carb_5007	111279		4266	8	4262	1	1299.78	30.5994	Sercon 20-22, Penryn	2020-01-05	1.58328	-4.02311
CVU_carb_4439	78921		4271	0	4266	8	1301.14	34.323	Sercon 20-22, Penryn	2019-01-25	0.748921	-3.99306
CVU_carb_4515	78922		4275	6	4271	0	1302.49	34.7616	Sercon 20-22, Penryn	2019-02-06	2.23056	-4.12201
CVU_carb_4607	78923		4280	1	4275	6	1303.87	34.5586	Sercon 20-22, Penryn	2019-02-13	1.22248	-3.81766
CVU_carb_4440	78924		4284	8	4280	1	1305.27	24.5438	Sercon 20-22, Penryn	2019-01-25	2.10916	-4.1852
CVU_carb_4516	78926		4289	4	4284	8	1306.68	39.8263	Sercon 20-22, Penryn	2019-02-06	1.03978	-4.26942
CVU_carb_4322	78927		4293	10	4289	4	1308.07	38.357	Sercon 20-22, Penryn	2019-01-22	2.09233	-4.09873
CVU_carb_4517	78928		4298	6	4293	10	1309.47	40.2067	Sercon 20-22, Penryn	2019-02-06	2.26005	-3.9835
CVU_carb_4518	78929		4303	6	4298	6	1310.94	50.1708	Sercon 20-22, Penryn	2019-02-06	2.48254	-4.31423
CVU_carb_4519	78930		4308	4	4303	6	1312.44	48.362	Sercon 20-22, Penryn	2019-02-06	2.43166	-4.61821
CVU_carb_4520	78931		4313	3	4308	4	1313.93	54.2981	Sercon 20-22, Penryn	2019-02-06	2.64474	-4.33182
CVU_carb_4521	78932		4318	2	4313	3	1315.43	52.9855	Sercon 20-22, Penryn	2019-02-10	2.15777	-4.31224
CVU_carb_4441	78933		4323	1	4318	2	1316.93	48.9775	Sercon 20-22, Penryn	2019-02-06	2.8824	-4.77935
CVU_carb_4608	78935		4327	10	4323	1	1318.4	49.9977	Sercon 20-22, Penryn	2019-02-13	2.04507	-4.15646
CVU_carb_5008	111280		4332	4	4327	10	1319.81	47.1033	Sercon 20-22, Penryn	2020-01-05	2.80557	-4.07924
CVU_carb_5009	111281		4337	1	4332	4	1321.22	80.956	Sercon 20-22, Penryn	2020-01-05	2.29224	-4.09132
CVU_carb_4522	78936		4341	10	4337	1	1322.67	75.1664	Sercon 20-22, Penryn	2019-02-10	2.02363	-3.89752
CVU_carb_4609	78937		4346	8	4341	10	1324.13	42.0613	Sercon 20-22, Penryn	2019-02-13	2.98227	-4.01318
CVU_carb_5010	111282		4351	1	4346	8	1325.54	37.2617	Sercon 20-22, Penryn	2020-01-05	2.60457	-4.36907
CVU_carb_4523	78938		4356	0	4351	1	1326.96	38.9883	Sercon 20-22, Penryn	2019-02-10	1.26054	-4.29327
CVU_carb_4524	78939		4360	10	4356	0	1328.45	38.2944	Sercon 20-22, Penryn	2019-02-10	1.77566	-4.26946
CVU_carb_4311	78940		4365	7	4360	10	1329.91	30.5155	Sercon 20-22, Penryn	2019-01-22	2.03189	-4.0418
CVU_carb_4527	78941		4370	2	4365	7	1331.33	31.5195	Sercon 20-22, Penryn	2019-02-10	2.27574	-4.15422
CVU_carb_5011	111283		4375	1	4370	2	1332.78	39.7456	Sercon 20-22, Penryn	2020-01-05	2.36662	-4.37965
CVU_carb_5012	111284		4379	8	4375	1	1334.22	32.2452	Sercon 20-22, Penryn	2020-01-05	2.4761	-4.36181
CVU_carb_4330	78942		4384	4	4379	8	1335.63	47.9101	Sercon 20-22, Penryn	2019-01-22	2.22144	-4.369
CVU_carb_4326	78943		4388	10	4384	4	1337.03	53.0407	Sercon 20-22, Penryn	2019-01-22	2.89171	-4.34015
CVU_carb_5013	111285		4393	8	4388	10	1338.45	47.747	Sercon 20-22, Penryn	2020-01-05	2.70822	-4.5832
CVU_carb_4163	78944		4398	4	4393	8	1339.9	9	Sercon 20-22, Penryn	2018-10-02	-6.44	-0.85
4157		BLD4157	4396	9	4396	9	1340.13	7.86067	Sercon 20-22, Penryn	2017-05-20	-4.54734	-1.05709
4158		BLD4158	4399	1	4399	1	1340.84	50.4548	Sercon 20-22, Penryn	2017-05-12	1.65989	-4.28928
4159		BLD4159	4400	1	4400	1	1341.15	36.1898	Sercon 20-22, Penryn	2017-05-12	1.7378	-3.98288
CVU_carb_4327	78946		4403	1	4398	4	1341.34	40.8671	Sercon 20-22, Penryn	2019-01-22	1.91571	-4.09018
4161		BLD4161	4400	10	4400	10	1341.37	49.3926	Sercon 20-22, Penryn	2017-05-12	1.90992	-4.22628
4163		BLD4163	4401	8	4401	8	1341.63	42.7816	Sercon 20-22, Penryn	2017-05-12	2.16274	-3.86383
4167		BLD4167	4402	2	4402	2	1341.78	39.3294	Sercon 20-22, Penryn	2017-05-12	2.15646	-4.18856
4171		BLD4171	4402	8	4402	8	1341.93	51.2192	Sercon 20-22, Penryn	2017-05-12	1.86512	-4.35781
4174		BLD4174	4403	8	4403	8	1342.24	46.8518	Sercon 20-22, Penryn	2017-05-12	1.62848	-4.35349
4177		BLD4177	4404	6	4404	6	1342.49	39.9911	Sercon 20-22, Penryn	2017-05-12	1.78944	-4.25187
4179		BLD4179	4405	3	4405	3	1342.72	29.1373	Sercon 20-22, Penryn	2017-05-12	2.15846	-4.32518
CVU_carb_5014	111286		4407	8	4403	1	1342.76	35.9068	Sercon 20-22, Penryn	2020-01-05	2.40852	-4.09686
4183		BLD4183	4406	1	4406	1	1342.97	38.5637	Sercon 20-22, Penryn	2017-05-12	2.49189	-4.36333
4185		BLD4185	4406	11	4406	11	1343.23	39.1644	Sercon 20-22, Penryn	2017-05-12	2.29832	-3.95826
4187		BLD4187	4407	4	4407	4	1343.36	41.4844	Sercon 20-22, Penryn	2017-05-12	2.38281	-3.81451
4188		BLD4188	4408	6	4408	6	1343.71	55.963	Sercon 20-22, Penryn	2017-05-12	1.35683	-4.36418
4189		BLD4189	4409	2	4409	2	1343.91	62.2712	Sercon 20-22, Penryn	2017-05-12	1.46668	-4.35147
4190		BLD4190	4409	9	4409	9	1344.09	32.4283	Sercon 20-22, Penryn	2017-05-12	2.43013	-4.19392
CVU_carb_4525	78948		4412	3	4407	8	1344.16	30.8293	Sercon 20-22, Penryn	2019-02-10	2.37679	-4.08623
4192		BLD4192	4410	5	4410	5	1344.3	41.1012	Sercon 20-22, Penryn	2017-05-12	2.18791	-4.19207
4197		BLD4197	4411	3	4411	3	1344.55	62.9953	Sercon 20-22, Penryn	2017-05-12	1.18065	-4.35623
4199		BLD4199	4413	0	4413	0	1345.08	32.1442	Sercon 20-22, Penryn	2017-05-12	2.17147	-3.91962
4204		BLD4204	4413	10	4413	10	1345.34	41.6495	Sercon 20-22, Penryn	2017-05-12	1.9955	-4.3397
CVU_carb_5015	111287		4416	11	4412	3	1345.57	41.996	Sercon 20-22, Penryn	2020-01-05	2.36886	-4.42904
4206		BLD4206	4414	7	4414	7	1345.57	56.832	Sercon 20-22, Penryn	2017-05-12	0.967183	-4.66728
4207		BLD4207	4415	11	4415	11	1345.97	30.4082	Sercon 20-22, Penryn	2017-05-12	2.23937	-4.54684
4208		BLD4208	4416	7	4416	7	1346.17	29.5783	Sercon 20-22, Penryn	2017-05-12	1.63594	-4.21696
4209		BLD4209	4418	4	4418	4	1346.71	57.6053	Sercon 20-22, Penryn	2017-05-12	1.02238	-4.60892
CVU_carb_4526	78949		4421	8	4416	11	1347	38.7259	Sercon 20-22, Penryn	2019-02-10	1.17584	-5.17214
4210		BLD4210	4419	11	4419	11	1347.19	39.2847	Sercon 20-22, Penryn	2017-05-12	1.25031	-4.88638
4212		BLD4212	4420	4	4420	4	1347.32	23.5942	Sercon 20-22, Penryn	2017-05-12	1.82104	-4.67782
4213		BLD4213	4421	4	4421	4	1347.62	23.1902	Sercon 20-22, Penryn	2017-05-12	1.82515	-4.55957
4214		BLD4214	4422	1	4422	1	1347.85	22.3328	Sercon 20-22, Penryn	2017-05-12	1.70722	-4.56173
4215		BLD4215	4423	10	4423	10	1348.38	22.5188	Sercon 20-22, Penryn	2017-05-12	1.27804	-4.26067
CVU_carb_4442	78950		4426	4	4421	8	1348.44	21.4837	Sercon 20-22, Penryn	2019-02-06	1.33832	-4.79909
4219		BLD4219	4424	6	4424	6	1348.59	35.3319	Sercon 20-22, Penryn	2017-05-12	0.731294	-5.08774
4221		BLD4221	4426	6	4426	6	1349.2	22.7803	Sercon 20-22, Penryn	2017-05-12	1.23498	-4.27301
CVU_carb_4528	78951		4431	1	4426	4	1349.87	18.9335	Sercon 20-22, Penryn	2019-02-10	1.46451	-5.33541
4223		BLD4223	4432	8	4432	8	1351.08	22.9504	Sercon 20-22, Penryn	2017-05-12	0.842564	-4.72393
CVU_carb_4529	78952		4435	8	4431	1	1351.29	23.4886	Sercon 20-22, Penryn	2019-02-10	1.31409	-5.82066
4224		BLD4224	4434	0	4434	0	1351.48	11.8872	Sercon 20-22, Penryn	2017-05-12	1.11977	-4.51064
4226		BLD4226	4434	5	4434	5	1351.61	13.9752	Sercon 20-22, Penryn	2017-05-12	1.16137	-4.37723
4227		BLD4227	4435	4	4435	4	1351.89	18.1836	Sercon 20-22, Penryn	2017-05-12	0.587441	-4.3447
4230		BLD4230	4436	3	4436	3	1352.17	15.8139	Sercon 20-22, Penryn	2017-05-12	0.162345	-4.3578
4233		BLD4233	4437	11	4437	11	1352.68	11.4098	Sercon 20-22, Penryn	2017-05-19	0.0747872	-4.14196
CVU_carb_4530	78953		4440	4	4435	8	1352.7	11.2024	Sercon 20-22, Penryn	2019-02-10	0.858943	-4.30387
4234		BLD4234	4438	5	4438	5	1352.83	10.226	Sercon 20-22, Penryn	2017-05-19	0.662621	-4.54448
4235		BLD4235	4439	3	4439	3	1353.08	10.7851	Sercon 20-22, Penryn	2017-05-19	1.10489	-4.25719
4238		BLD4238	4439	11	4439	11	1353.29	9.48221	Sercon 20-22, Penryn	2017-05-19	0.603713	-4.1176
4243		BLD4243	4440	10	4440	10	1353.57	10.4588	Sercon 20-22, Penryn	2017-05-19	0.687639	-4.26549
CVU_carb_4531	78984		4445	1	4440	4	1354.14	14.8848	Sercon 20-22, Penryn	2019-02-10	1.26734	-3.98487
4247		BLD4247	4442	9	4442	9	1354.15	14.066	Sercon 20-22, Penryn	2017-05-19	0.519026	-4.62208
4248		BLD4248	4446	7	4446	7	1355.32	15.6263	Sercon 20-22, Penryn	2017-05-19	1.13867	-4.55839
CVU_carb_4111	78955		4449	11	4445	1	1355.6	16.2289	Sercon 20-22, Penryn	2018-09-07	-0.35855	-4.55432
4250		BLD4250	4447	9	4447	9	1355.67	16.3287	Sercon 20-22, Penryn	2017-05-19	0.952973	-4.70626
4252		BLD4252	4448	6	4448	6	1355.9	20.7677	Sercon 20-22, Penryn	2017-05-19	0.164153	-5.22065
4253		BLD4253	4450	5	4450	5	1356.49	12.692	Sercon 20-22, Penryn	2017-05-19	0.666584	-4.49721
4254		BLD4254	4450	10	4450	10	1356.61	12.5234	Sercon 20-22, Penryn	2017-05-19	-1.08207	-3.67637
CVU_carb_4159	78956		4454	4	4449	11	1357.01	13.6	Sercon 20-22, Penryn	2018-10-02	0.19	-4.35
4256		BLD4256	4452	8	4452	8	1357.17	17.8907	Sercon 20-22, Penryn	2017-05-19	0.482419	-4.7655
4257		BLD4257	4455	9	4455	9	1358.11	20.2157	Sercon 20-22, Penryn	2017-05-19	-0.205024	-5.53502
4258		BLD4258	4456	5	4456	5	1358.32	31.0974	Sercon 20-22, Penryn	2017-05-19	-0.281546	-5.98422
CVU_carb_4532	78957		4462	10	4454	4	1358.98	13.8386	Sercon 20-22, Penryn	2019-02-10	0.532197	-5.16066
4260		BLD4260	4464	6	4464	6	1360.78	17.324	Sercon 20-22, Penryn	2017-05-19	-1.12808	-4.5734
4261		BLD4261	4465	0	4465	0	1360.93	11.1039	Sercon 20-22, Penryn	2017-05-19	-0.497726	-5.80278
CVU_carb_4533	78958		4468	2	4462	10	1361.08	8.39074	Sercon 20-22, Penryn	2019-02-10	-0.559064	-5.39189
4262		BLD4262	4465	11	4465	11	1361.21	15.7353	Sercon 20-22, Penryn	2017-05-19	-0.619176	-5.46878
4263		BLD4263	4468	7	4468	7	1362.02	10.5016	Sercon 20-22, Penryn	2017-05-19	-0.686604	-5.06434
CVU_carb_4534	78959		4473	2	4468	4	1362.68	14.6539	Sercon 20-22, Penryn	2019-02-10	-1.78768	-5.70563
4265		BLD4265	4472	5	4472	5	1363.19	12.4069	Sercon 20-22, Penryn	2017-05-19	-0.84642	-5.49662
4266		BLD4266	4472	10	4472	10	1363.32	11.5285	Sercon 20-22, Penryn	2017-05-19	-0.431417	-5.16645
4267		BLD4267	4473	6	4473	6	1363.52	12.5696	Sercon 20-22, Penryn	2017-05-19	-0.394304	-4.37617
4268		BLD4268	4474	5	4474	5	1363.8	15.7585	Sercon 20-22, Penryn	2017-05-19	-0.499354	-4.79263
CVU_carb_4443	78960		4477	8	4473	2	1364.11	17.5247	Sercon 20-22, Penryn	2019-02-06	-0.45756	-6.05088
4269		BLD4269	4477	4	4477	4	1364.69	21.5517	Sercon 20-22, Penryn	2017-05-19	-0.704407	-5.85555
4270		BLD4270	4478	0	4478	0	1364.89	16.4516	Sercon 20-22, Penryn	2017-05-19	-0.486057	-4.84927
4271		BLD4271	4479	6	4479	6	1365.35	9.26699	Sercon 20-22, Penryn	2017-05-19	-0.753279	-4.45375
4272		BLD4272	4481	1	4481	1	1365.83	12.772	Sercon 20-22, Penryn	2017-05-19	-1.09068	-3.94848
CVU_carb_4535	78962		4482	10	4479	8	1365.89	9.23852	Sercon 20-22, Penryn	2019-02-10	-0.236449	-4.97899
4273		BLD4273	4482	1	4482	1	1366.14	13.2884	Sercon 20-22, Penryn	2017-05-19	-0.861567	-4.76145
CVU_carb_5016	111288		4487	2	4482	10	1367.03	12.9789	Sercon 20-22, Penryn	2020-01-05	-0.73285	-4.15409
4274		BLD4274	4485	7	4485	7	1367.21	12.908	Sercon 20-22, Penryn	2017-05-19	-0.21979	-4.42024
4276		BLD4276	4487	9	4487	9	1367.87	14.4637	Sercon 20-22, Penryn	2017-05-19	-0.889117	-4.18418
4277		BLD4277	4488	3	4488	3	1368.02	13.1094	Sercon 20-22, Penryn	2017-05-19	-0.923991	-3.93914
CVU_carb_5017	111289		4491	9	4487	2	1368.39	14.547	Sercon 20-22, Penryn	2020-01-05	-1.21166	-4.10495
4278		BLD4278	4489	8	4489	8	1368.45	14.3202	Sercon 20-22, Penryn	2017-05-19	0.0243748	-4.24044
4284		BLD4284	4490	4	4490	4	1368.65	15.3968	Sercon 20-22, Penryn	2017-05-19	-0.402953	-4.2819
4285		BLD4285	4490	11	4490	11	1368.83	15.2028	Sercon 20-22, Penryn	2017-05-19	-0.132427	-4.36428
4286		BLD4286	4491	9	4491	9	1369.09	9.96633	Sercon 20-22, Penryn	2017-05-19	-0.0358214	-4.60012
4288		BLD4288	4493	8	4493	8	1369.67	9.25251	Sercon 20-22, Penryn	2017-05-19	-1.30074	-3.9553
CVU_carb_5018	111290		4496	6	4491	9	1369.81	7.81867	Sercon 20-22, Penryn	2020-01-05	-0.996097	-4.85048
4289		BLD4289	4497	2	4497	2	1370.74	5.22047	Sercon 20-22, Penryn	2017-05-19	-1.24053	-4.40203
4291		BLD4291	4498	0	4498	0	1370.99	5.38306	Sercon 20-22, Penryn	2017-05-19	-1.1637	-4.8899
4292		BLD4292	4498	2	4498	2	1371.04	7.1465	Sercon 20-22, Penryn	2017-05-19	-1.98421	-4.85579
CVU_carb_5019	111291		4501	0	4496	6	1371.22	7.72008	Sercon 20-22, Penryn	2020-01-05	-2.23662	-4.77447
4293		BLD4293	4498	10	4498	10	1371.24	7.52098	Sercon 20-22, Penryn	2017-05-19	-1.25255	-4.18762
4294		BLD4294	4499	5	4499	5	1371.42	6.59229	Sercon 20-22, Penryn	2017-05-19	-1.51654	-4.62028
4296		BLD4296	4499	9	4499	9	1371.52	5.44946	Sercon 20-22, Penryn	2017-05-19	-1.93557	-4.10469
4298		BLD4298	4500	2	4500	2	1371.65	5.36378	Sercon 20-22, Penryn	2017-05-19	-1.89509	-4.06386
4299		BLD4299	4500	10	4500	10	1371.85	6.77765	Sercon 20-22, Penryn	2017-05-19	-1.41612	-3.81913
4300		BLD4300	4501	6	4501	6	1372.06	8.49823	Sercon 20-22, Penryn	2017-05-19	-2.60795	-3.22761
4302		BLD4302	4502	2	4502	2	1372.26	8.76735	Sercon 20-22, Penryn	2017-05-19	-1.90351	-4.10784
4303		BLD4303	4502	9	4502	9	1372.44	7.77411	Sercon 20-22, Penryn	2017-05-19	-2.70803	-3.63501
4305		BLD4305	4503	4	4503	4	1372.62	7.11325	Sercon 20-22, Penryn	2017-05-19	-3.17097	-3.33972
CVU_carb_4536	78963		4506	0	4501	0	1372.67	9.36391	Sercon 20-22, Penryn	2019-02-10	-1.09931	-5.0837
4309		BLD4309	4505	9	4505	9	1373.35	6.8968	Sercon 20-22, Penryn	2017-05-19	-1.66518	-4.07098
4314		BLD4314	4506	2	4506	2	1373.48	7.45982	Sercon 20-22, Penryn	2017-05-19	-1.45919	-3.95566
4315		BLD4315	4506	9	4506	9	1373.66	5.9297	Sercon 20-22, Penryn	2017-05-19	-1.35969	-4.00488
4317		BLD4317	4507	1	4507	1	1373.76	7.06529	Sercon 20-22, Penryn	2017-05-19	-1.2773	-4.04032
CVU_carb_5020	111292		4510	11	4506	0	1374.18	13.8946	Sercon 20-22, Penryn	2020-01-05	-1.48163	-5.51753
4318		BLD4318	4508	9	4508	9	1374.27	10.446	Sercon 20-22, Penryn	2017-05-19	-1.07474	-4.89451
4320		BLD4320	4509	3	4509	3	1374.42	10.085	Sercon 20-22, Penryn	2017-05-19	-1.49729	-4.39811
CVU_carb_5021	111293		4515	6	4510	11	1375.63	14.0808	Sercon 20-22, Penryn	2020-01-05	-1.05809	-5.29651
4321		BLD4321	4515	9	4515	9	1376.4	10.6626	Sercon 20-22, Penryn	2017-05-20	-2.55479	-2.7519
4324		BLD4324	4517	9	4517	9	1377.01	12.686	Sercon 20-22, Penryn	2017-05-19	-1.18632	-5.41802
CVU_carb_4119	78964		4521	0	4515	7	1377.18	6.78899	Sercon 20-22, Penryn	2018-09-07	-1.03518	-5.78055
4325		BLD4325	4518	9	4518	9	1377.32	13.7585	Sercon 20-22, Penryn	2017-05-19	-1.16835	-5.42736
4327		BLD4327	4529	4	4529	4	1380.54	7.91727	Sercon 20-22, Penryn	2017-05-19	-1.67508	-3.82207
4330		BLD4330	4530	0	4530	0	1380.74	5.39319	Sercon 20-22, Penryn	2017-05-19	-0.393938	-4.9014
CVU_carb_4184	78965		4532	10	4528	0	1380.87	7.2	Sercon 20-22, Penryn	2018-10-02	-1.08	-3.95
4331		BLD4331	4532	8	4532	8	1381.56	9.27719	Sercon 20-22, Penryn	2017-05-19	-1.09129	-4.36993
4335		BLD4335	4533	4	4533	4	1381.76	10.1694	Sercon 20-22, Penryn	2017-05-19	-0.969106	-4.09858
4336		BLD4336	4533	8	4533	8	1381.86	13.8686	Sercon 20-22, Penryn	2017-05-19	-0.933848	-3.50123
4337		BLD4337	4534	7	4534	7	1382.14	13.092	Sercon 20-22, Penryn	2017-05-19	-0.882213	-4.01042
CVU_carb_5022	111294		4537	10	4532	10	1382.37	12.7415	Sercon 20-22, Penryn	2020-01-05	-1.44229	-3.72339
4339		BLD4339	4535	6	4535	6	1382.42	10.8311	Sercon 20-22, Penryn	2017-05-19	-0.510674	-5.05986
4340		BLD4340	4537	8	4537	8	1383.08	11.86	Sercon 20-22, Penryn	2017-05-19	0.70611	-4.6533
4341		BLD4341	4538	5	4538	5	1383.31	5.84486	Sercon 20-22, Penryn	2017-05-19	-0.681254	-4.44479
4342		BLD4342	4538	9	4538	9	1383.41	4.48978	Sercon 20-22, Penryn	2017-05-19	-0.741271	-4.08556
4343		BLD4343	4539	7	4539	7	1383.66	3.03646	Sercon 20-22, Penryn	2017-05-12	-1.37142	-3.34102
4344		BLD4344	4540	0	4540	0	1383.79	4.80123	Sercon 20-22, Penryn	2017-05-19	-0.93199	-4.03848
CVU_carb_4174	78966		4542	8	4537	10	1383.87	5.3	Sercon 20-22, Penryn	2018-10-02	-0.54	-4.29
4346		BLD4346	4540	7	4540	7	1383.97	6.45589	Sercon 20-22, Penryn	2017-05-19	-0.848833	-3.94322
4347		BLD4347	4541	3	4541	3	1384.17	5.16617	Sercon 20-22, Penryn	2017-05-19	-1.10168	-4.24615
4348		BLD4348	4544	0	4544	0	1385.01	6.42523	Sercon 20-22, Penryn	2017-05-19	-1.10735	-4.21361
CVU_carb_4168	78967		4547	8	4542	8	1385.37	6.7	Sercon 20-22, Penryn	2018-10-02	-2.21	-2.61
4350		BLD4350	4547	11	4547	11	1386.2	4.88684	Sercon 20-22, Penryn	2017-05-19	-1.35796	-4.11872
4351		BLD4351	4548	6	4548	6	1386.38	5.22143	Sercon 20-22, Penryn	2017-05-19	-0.69754	-4.37763
4352		BLD4352	4549	1	4549	1	1386.56	8.99833	Sercon 20-22, Penryn	2017-05-19	-0.891899	-4.32166
4353		BLD4353	4550	0	4550	0	1386.84	6.43241	Sercon 20-22, Penryn	2017-05-19	-1.17091	-4.14138
CVU_carb_5023	111295		4552	7	4547	8	1386.88	8.01102	Sercon 20-22, Penryn	2020-01-05	-0.13694	-4.44281
4355		BLD4355	4550	4	4550	4	1386.94	6.366	Sercon 20-22, Penryn	2017-05-19	-0.506268	-4.32263
4360		BLD4360	4552	10	4552	10	1387.7	8.492	Sercon 20-22, Penryn	2017-05-19	-0.417341	-4.22225
4361		BLD4361	4553	4	4553	4	1387.86	11.2861	Sercon 20-22, Penryn	2017-05-19	-1.89619	-3.24617
4363		BLD4363	4554	9	4554	9	1388.29	14.1984	Sercon 20-22, Penryn	2017-05-19	-1.31769	-3.53834
CVU_carb_4611	78969		4557	6	4552	7	1388.38	17.1477	Sercon 20-22, Penryn	2019-02-13	0.368039	-4.60269
4366		BLD4366	4556	7	4556	7	1388.85	18.0901	Sercon 20-22, Penryn	2017-05-19	0.531953	-4.59173
4367		BLD4367	4559	0	4559	0	1389.58	12.2789	Sercon 20-22, Penryn	2017-05-19	-0.623857	-4.19989
4370		BLD4370	4559	7	4559	7	1389.76	9.50659	Sercon 20-22, Penryn	2017-05-19	-0.487226	-4.35998
CVU_carb_5024	111296		4562	6	4557	6	1389.89	12.579	Sercon 20-22, Penryn	2020-01-05	-1.16204	-4.11557
4375		BLD4375	4560	4	4560	4	1389.99	24.3737	Sercon 20-22, Penryn	2017-05-20	-5.21898	-0.767079
4377		BLD4377	4561	1	4561	1	1390.22	11.0821	Sercon 20-22, Penryn	2017-05-20	0.267684	-4.70493
4378		BLD4378	4561	9	4561	9	1390.42	19.5403	Sercon 20-22, Penryn	2017-05-20	0.415381	-4.60164
4380		BLD4380	4562	5	4562	5	1390.62	14.4512	Sercon 20-22, Penryn	2017-05-20	0.523119	-4.73453
4381		BLD4381	4562	10	4562	10	1390.75	16.6293	Sercon 20-22, Penryn	2017-05-20	0.307704	-4.84301
4382		BLD4382	4563	3	4563	3	1390.88	16.9527	Sercon 20-22, Penryn	2017-05-20	0.345996	-4.77048
4384		BLD4384	4563	9	4563	9	1391.03	15.7742	Sercon 20-22, Penryn	2017-05-20	0.224203	-4.60197
4385		BLD4385	4564	8	4564	8	1391.31	16.0819	Sercon 20-22, Penryn	2017-05-20	-0.0307062	-4.37925
CVU_carb_4612	78970		4567	3	4562	6	1391.37	16.9353	Sercon 20-22, Penryn	2019-02-13	0.545467	-4.49178
4387		BLD4387	4565	8	4565	8	1391.62	29.0814	Sercon 20-22, Penryn	2017-05-20	0.3552	-4.42388
4389		BLD4389	4566	10	4566	10	1391.97	26.5864	Sercon 20-22, Penryn	2017-05-20	0.930437	-4.85162
4391		BLD4391	4567	11	4567	11	1392.3	40.5979	Sercon 20-22, Penryn	2017-05-20	0.654749	-4.88752
4393		BLD4393	4568	8	4568	8	1392.53	34.0874	Sercon 20-22, Penryn	2017-05-20	0.507313	-4.62969
CVU_carb_5025	111297		4572	2	4567	4	1392.86	27.3868	Sercon 20-22, Penryn	2020-01-05	0.404803	-4.0699
4395		BLD4395	4569	10	4569	10	1392.89	40.5536	Sercon 20-22, Penryn	2017-05-20	0.552278	-4.68532
4396		BLD4396	4571	2	4571	2	1393.29	38.8019	Sercon 20-22, Penryn	2017-05-20	0.333524	-4.85338
4401		BLD4401	4571	11	4571	11	1393.52	29.6185	Sercon 20-22, Penryn	2017-05-20	1.56145	-4.18465
4403		BLD4403	4572	6	4572	6	1393.7	26.8764	Sercon 20-22, Penryn	2017-05-20	1.39508	-4.33291
4406		BLD4406	4572	10	4572	10	1393.8	25.6731	Sercon 20-22, Penryn	2017-05-20	0.971657	-4.30866
4408		BLD4408	4573	11	4573	11	1394.13	32.171	Sercon 20-22, Penryn	2017-05-20	0.971166	-4.55126
4410		BLD4410	4574	3	4574	3	1394.23	31.9306	Sercon 20-22, Penryn	2017-05-20	0.939997	-4.50026
CVU_carb_4613	78971		4577	2	4572	2	1394.36	38.7304	Sercon 20-22, Penryn	2019-02-13	0.741462	-4.54822
4411		BLD4411	4574	11	4574	11	1394.43	25.821	Sercon 20-22, Penryn	2017-05-20	0.545147	-4.38965
4412		BLD4412	4575	6	4575	6	1394.61	31.2586	Sercon 20-22, Penryn	2017-05-20	0.866767	-4.26562
4417		BLD4417	4576	0	4576	0	1394.76	29.2956	Sercon 20-22, Penryn	2017-05-20	1.2139	-4.24685
4420		BLD4420	4576	6	4576	6	1394.92	39.4905	Sercon 20-22, Penryn	2017-05-20	0.865442	-4.44987
4422		BLD4422	4577	2	4577	2	1395.12	28.2211	Sercon 20-22, Penryn	2017-05-20	0.782632	-4.01177
4424		BLD4424	4577	7	4577	7	1395.25	28.3066	Sercon 20-22, Penryn	2017-05-20	0.949999	-4.30069
4425		BLD4425	4578	2	4578	2	1395.43	32.8334	Sercon 20-22, Penryn	2017-05-20	0.771439	-4.43962
4426		BLD4426	4579	6	4579	6	1395.83	51.3702	Sercon 20-22, Penryn	2017-05-20	0.848994	-4.73888
CVU_carb_5026	111298		4582	0	4577	2	1395.86	13.0192	Sercon 20-22, Penryn	2020-01-05	-0.876572	-4.74029
4429		BLD4429	4580	3	4580	3	1396.06	36.7485	Sercon 20-22, Penryn	2017-05-20	1.06958	-4.42555
4430		BLD4430	4581	0	4581	0	1396.29	33.1473	Sercon 20-22, Penryn	2017-05-20	1.56577	-4.44655
4432		BLD4432	4581	5	4581	5	1396.42	27.2748	Sercon 20-22, Penryn	2017-05-20	1.09695	-4.33083
4433		BLD4433	4583	6	4583	6	1397.05	27.3566	Sercon 20-22, Penryn	2017-05-20	0.801775	-3.91861
4438		BLD4438	4584	1	4584	1	1397.23	40.8421	Sercon 20-22, Penryn	2017-05-20	0.40688	-4.12108
CVU_carb_4615	78972		4587	0	4582	0	1397.36	29.5701	Sercon 20-22, Penryn	2019-02-13	0.110642	-4.18534
4442		BLD4442	4584	8	4584	8	1397.41	35.2228	Sercon 20-22, Penryn	2017-05-20	0.444617	-4.12904
4443		BLD4443	4585	2	4585	2	1397.56	32.8655	Sercon 20-22, Penryn	2017-05-20	0.517658	-4.10218
4444		BLD4444	4586	0	4586	0	1397.81	27.1241	Sercon 20-22, Penryn	2017-05-20	0.400343	-4.11275
4445		BLD4445	4586	8	4586	8	1398.02	27.6381	Sercon 20-22, Penryn	2017-05-20	0.837947	-4.39651
4449		BLD4449	4587	3	4587	3	1398.19	27.7847	Sercon 20-22, Penryn	2017-05-20	0.892156	-4.55645
4450		BLD4450	4588	3	4588	3	1398.5	24.9425	Sercon 20-22, Penryn	2017-05-20	1.19349	-4.46204
4456		BLD4456	4588	10	4588	10	1398.68	23.4163	Sercon 20-22, Penryn	2017-05-20	1.30984	-4.28184
CVU_carb_5027	111299		4592	0	4587	0	1398.88	24.0308	Sercon 20-22, Penryn	2020-01-05	0.920456	-4.43149
4458		BLD4458	4589	11	4589	11	1399.01	26.0911	Sercon 20-22, Penryn	2017-05-20	1.23975	-4.30327
4459		BLD4459	4590	4	4590	4	1399.13	24.8946	Sercon 20-22, Penryn	2017-05-20	0.906327	-4.35873
4460		BLD4460	4591	6	4591	6	1399.49	16.1309	Sercon 20-22, Penryn	2017-05-20	0.323035	-4.12234
4461		BLD4461	4592	1	4592	1	1399.67	17.8917	Sercon 20-22, Penryn	2017-05-20	0.513812	-4.37392
4463		BLD4463	4592	8	4592	8	1399.84	18.6778	Sercon 20-22, Penryn	2017-05-20	0.861853	-4.49362
4467		BLD4467	4593	3	4593	3	1400.02	21.0425	Sercon 20-22, Penryn	2017-05-20	1.24059	-4.66412
4469		BLD4469	4593	11	4593	11	1400.23	27.0177	Sercon 20-22, Penryn	2017-05-20	1.00981	-4.68613
4470		BLD4470	4594	9	4594	9	1400.48	24.1251	Sercon 20-22, Penryn	2017-05-20	0.837826	-4.70387
CVU_carb_5028	111300		4596	10	4593	0	1400.53	10.1124	Sercon 20-22, Penryn	2020-01-05	0.893864	-4.84505
4472		BLD4472	4595	5	4595	5	1400.68	36.1344	Sercon 20-22, Penryn	2017-05-20	0.904951	-4.83725
4474		BLD4474	4596	1	4596	1	1400.89	26.0643	Sercon 20-22, Penryn	2017-05-20	1.21204	-4.58784
4477		BLD4477	4596	9	4596	9	1401.09	21.3406	Sercon 20-22, Penryn	2017-05-20	1.27721	-4.52606
4478		BLD4478	4598	1	4598	1	1401.5	33.6337	Sercon 20-22, Penryn	2017-05-20	0.901397	-4.79569
4480		BLD4480	4598	10	4598	10	1401.72	26.8448	Sercon 20-22, Penryn	2017-05-20	1.40403	-4.87118
CVU_carb_5029	111301		4601	10	4596	10	1401.88	32.0047	Sercon 20-22, Penryn	2020-01-05	1.21501	-4.94114
4482		BLD4482	4600	1	4600	1	1402.11	24.4235	Sercon 20-22, Penryn	2017-05-20	0.878663	-4.55189
4487		BLD4487	4600	10	4600	10	1402.33	29.9812	Sercon 20-22, Penryn	2017-05-20	1.15122	-4.58236
4489		BLD4489	4603	6	4603	6	1403.15	27.0515	Sercon 20-22, Penryn	2017-05-20	0.999368	-4.62144
CVU_carb_5030	111302		4606	8	4601	10	1403.38	14.4624	Sercon 20-22, Penryn	2020-01-05	0.0881143	-3.68843
4490		BLD4490	4604	6	4604	6	1403.45	24.1395	Sercon 20-22, Penryn	2017-05-20	1.03918	-4.20432
4494		BLD4494	4605	8	4605	8	1403.81	17.7872	Sercon 20-22, Penryn	2017-05-20	0.0529027	-3.84571
4496		BLD4496	4606	4	4606	4	1404.01	20.0262	Sercon 20-22, Penryn	2017-05-20	0.720204	-4.4509
4501		BLD4501	4607	2	4607	2	1404.26	19.0206	Sercon 20-22, Penryn	2017-05-20	0.837531	-4.19586
4503		BLD4503	4607	9	4607	9	1404.44	19.5423	Sercon 20-22, Penryn	2017-05-20	1.03195	-4.20213
4504		BLD4504	4608	5	4608	5	1404.65	20.9088	Sercon 20-22, Penryn	2017-05-20	1.10161	-4.25557
CVU_carb_4614	78973		4611	4	4606	8	1404.82	29.6979	Sercon 20-22, Penryn	2019-02-13	1.6596	-4.87512
4506		BLD4506	4609	1	4609	1	1404.85	31.2615	Sercon 20-22, Penryn	2017-05-20	0.680426	-4.31273
4509		BLD4509	4609	8	4609	8	1405.03	34.4349	Sercon 20-22, Penryn	2017-05-20	1.4441	-4.93152
4511		BLD4511	4610	5	4610	5	1405.26	34.4766	Sercon 20-22, Penryn	2017-05-20	1.33217	-4.56141
4514		BLD4514	4611	4	4611	4	1405.53	38.5234	Sercon 20-22, Penryn	2017-05-20	1.09824	-4.72363
4517		BLD4517	4612	2	4612	2	1405.79	28.4038	Sercon 20-22, Penryn	2017-05-20	0.680128	-4.50792
4518		BLD4518	4612	6	4612	6	1405.89	28.3393	Sercon 20-22, Penryn	2017-05-20	0.764223	-4.45101
CVU_carb_4537	78974		4616	1	4611	4	1406.26	20.919	Sercon 20-22, Penryn	2019-02-10	0.672308	-4.33009
4519		BLD4519	4613	10	4613	10	1406.3	23.2377	Sercon 20-22, Penryn	2017-05-20	0.419257	-4.02363
4520		BLD4520	4614	1	4614	1	1406.37	21.5939	Sercon 20-22, Penryn	2017-05-20	0.596842	-4.069
4522		BLD4522	4614	8	4614	8	1406.55	24.6051	Sercon 20-22, Penryn	2017-05-20	0.768937	-4.11202
4524		BLD4524	4615	9	4615	9	1406.88	20.5568	Sercon 20-22, Penryn	2017-05-20	0.405737	-4.06231
CVU_carb_5031	111303		4625	9	4616	1	1408.46	28.3811	Sercon 20-22, Penryn	2020-01-05	1.66478	-4.93683
4526		BLD4526	4626	0	4626	0	1410	44.312	Sercon 20-22, Penryn	2017-05-20	1.01723	-4.80633
4530		BLD4530	4627	1	4627	1	1410.34	27.3758	Sercon 20-22, Penryn	2017-05-20	1.23323	-4.48146
CVU_carb_5032	111304		4630	8	4625	9	1410.68	34.6717	Sercon 20-22, Penryn	2020-01-05	0.902252	-4.10037
CVU_carb_5033	111305		4635	4	4630	8	1412.14	27.6045	Sercon 20-22, Penryn	2020-01-05	0.281075	-3.49028
CVU_carb_4616	78975		4640	0	4635	4	1413.56	36.6633	Sercon 20-22, Penryn	2019-02-13	0.759728	-4.1453
CVU_carb_4538	78976		4644	8	4640	0	1414.98	32.7804	Sercon 20-22, Penryn	2019-02-10	1.31795	-3.17369
CVU_carb_4539	78977		4649	5	4644	5	1416.38	37.4636	Sercon 20-22, Penryn	2019-02-10	0.639966	-4.23612
CVU_carb_5034	111306		4649	5	4644	8	1416.42	20.4873	Sercon 20-22, Penryn	2020-01-05	1.064	-3.94767
CVU_carb_4617	78978		4654	3	4649	5	1417.88	34.3333	Sercon 20-22, Penryn	2019-02-13	1.21195	-4.06632
CVU_carb_4618	78979		4658	10	4654	3	1419.31	19.8716	Sercon 20-22, Penryn	2019-02-13	0.794634	-4.26465
CVU_carb_5035	111307		4658	10	4654	3	1419.31	24.7583	Sercon 20-22, Penryn	2020-01-05	0.527173	-4.32258
CVU_carb_5036	111308		4663	8	4658	10	1420.75	28.8897	Sercon 20-22, Penryn	2020-01-05	1.30367	-4.46257
CVU_carb_5037	111309		4668	8	4663	8	1422.25	30.432	Sercon 20-22, Penryn	2020-01-05	0.878223	-4.31988
CVU_carb_4321	78980		4673	2	4668	7	1423.68	33.695	Sercon 20-22, Penryn	2019-01-22	1.15503	-4.87887
CVU_carb_4619	78981		4678	0	4673	2	1425.12	24.6957	Sercon 20-22, Penryn	2019-02-13	0.622086	-4.52352
CVU_carb_4620	78982		4682	9	4678	0	1426.58	19.9941	Sercon 20-22, Penryn	2019-02-13	1.05092	-4.62224
CVU_carb_5038	111310		4687	4	4682	9	1428	36.8649	Sercon 20-22, Penryn	2020-01-05	0.905789	-4.51806
CVU_carb_4621	78983		4691	9	4687	4	1429.37	24.1241	Sercon 20-22, Penryn	2019-02-13	1.0145	-5.37699
CVU_carb_4622	78984		4696	6	4691	9	1430.77	22.4342	Sercon 20-22, Penryn	2019-02-13	0.898193	-4.07674
CVU_carb_4540	78985		4701	1	4696	5	1432.18	22.3083	Sercon 20-22, Penryn	2019-02-10	1.01338	-4.82835
CVU_carb_4318	78986		4705	10	4701	1	1433.61	44.3183	Sercon 20-22, Penryn	2019-01-22	1.28999	-3.57947
CVU_carb_5039	111311		4710	5	4705	10	1435.04	33.2156	Sercon 20-22, Penryn	2020-01-05	1.15679	-4.90946
CVU_carb_5040	111432		4715	4	4710	5	1436.48	31.5232	Sercon 20-22, Penryn	2020-01-05	1.00544	-4.40422
CVU_carb_5041	111433		4719	11	4715	4	1437.93	24.2659	Sercon 20-22, Penryn	2020-01-05	1.68166	-4.37918
CVU_carb_4623	78987		4724	7	4719	11	1439.34	25.9886	Sercon 20-22, Penryn	2019-02-13	0.91009	-4.60945
CVU_carb_5042	111434		4729	4	4724	7	1440.78	22.8495	Sercon 20-22, Penryn	2020-01-05	1.19745	-4.71751
CVU_carb_5043	111435		4734	0	4729	4	1442.21	26.4677	Sercon 20-22, Penryn	2020-01-05	0.708462	-3.99195
CVU_carb_5044	111436		4738	8	4734	0	1443.63	20.4494	Sercon 20-22, Penryn	2020-01-05	0.592023	-4.14619
CVU_carb_4624	78988		4743	2	4738	8	1445.03	17.7238	Sercon 20-22, Penryn	2019-02-13	0.313027	-4.53201
CVU_carb_5045	111437		4747	7	4743	2	1446.39	16.3155	Sercon 20-22, Penryn	2020-01-05	0.0749822	-4.18879
CVU_carb_4309	78989		4752	3	4747	8	1447.79	39.4485	Sercon 20-22, Penryn	2019-01-22	-0.657196	-6.53707
CVU_carb_4625	78990		4757	0	4752	3	1449.21	13.0785	Sercon 20-22, Penryn	2019-02-13	0.405705	-3.60168
CVU_carb_5046	111438		4761	8	4757	0	1450.64	11.9502	Sercon 20-22, Penryn	2020-01-05	-0.422739	-4.12392
CVU_carb_5047	111439		4766	8	4761	8	1452.12	6.54189	Sercon 20-22, Penryn	2020-01-05	-1.64113	-4.24713
CVU_carb_5048	111440		4771	4	4766	8	1453.59	8.92197	Sercon 20-22, Penryn	2020-01-05	-1.34247	-4.5235
CVU_carb_5049	111441		4776	3	4771	4	1455.05	12.2648	Sercon 20-22, Penryn	2020-01-05	-0.0714286	-3.78444
CVU_carb_5050	111442		4781	0	4776	3	1456.52	11.5389	Sercon 20-22, Penryn	2020-01-05	0.0115274	-3.90541
CVU_carb_5051	111443		4785	8	4781	0	1457.96	8.72838	Sercon 20-22, Penryn	2020-01-05	-0.111542	-3.39478
CVU_carb_5052	111444		4790	5	4785	8	1459.4	10.1887	Sercon 20-22, Penryn	2020-01-05	-0.0213302	-3.82284
CVU_carb_4626	78991		4799	8	4795	0	1462.23	12.712	Sercon 20-22, Penryn	2019-02-13	1.42494	-3.526
CVU_carb_5053	111445		4799	8	4795	0	1462.23	17.7428	Sercon 20-22, Penryn	2020-01-05	1.5071	-3.91046
CVU_carb_5054	111446		4803	0	4799	8	1463.45	16.721	Sercon 20-22, Penryn	2020-01-05	1.33987	-3.89468
CVU_carb_5055	111447		4807	1	4803	0	1464.58	24.6269	Sercon 20-22, Penryn	2020-01-05	2.08643	-3.94895
CVU_carb_5056	111448		4811	6	4807	1	1465.87	38.752	Sercon 20-22, Penryn	2020-01-05	1.75275	-4.35314
CVU_carb_4627	78992		4816	3	4811	6	1467.27	43.4624	Sercon 20-22, Penryn	2019-02-13	1.60306	-4.61814
CVU_carb_4628	78993		4820	10	4816	3	1468.69	37.3422	Sercon 20-22, Penryn	2019-02-13	1.54249	-3.74038
CVU_carb_5057	111449		4825	3	4820	10	1470.06	43.7699	Sercon 20-22, Penryn	2020-01-05	2.05954	-4.00555
CVU_carb_5058	111450		4829	4	4825	3	1471.36	35.2631	Sercon 20-22, Penryn	2020-01-05	1.53703	-4.0204
CVU_carb_5059	111451		4833	10	4829	4	1472.67	32.8401	Sercon 20-22, Penryn	2020-01-05	1.55547	-4.68674
CVU_carb_5060	111452		4838	6	4833	10	1474.06	19.868	Sercon 20-22, Penryn	2020-01-05	0.966636	-4.20831
CVU_carb_5061	111453		4843	3	4838	6	1475.5	42.0336	Sercon 20-22, Penryn	2020-01-05	1.39377	-4.49378
CVU_carb_5062	111454		4847	10	4843	3	1476.92	33.5763	Sercon 20-22, Penryn	2020-01-05	1.73544	-4.25697
CVU_carb_4541	78994		4852	3	4847	10	1478.29	25.0819	Sercon 20-22, Penryn	2019-02-10	1.27352	-4.4931
CVU_carb_5063	111455		4856	8	4852	3	1479.64	30.1872	Sercon 20-22, Penryn	2020-01-05	1.76429	-5.07404
CVU_carb_4332	78995		4861	1	4856	8	1480.99	13.7076	Sercon 20-22, Penryn	2019-01-22	0.57519	-4.42746
CVU_carb_5064	111388		4865	8	4861	1	1482.36	19.0069	Sercon 20-22, Penryn	2020-01-05	0.497561	-5.29908
CVU_carb_4542	78996		4870	0	4865	8	1483.72	34.342	Sercon 20-22, Penryn	2019-02-10	-0.31509	-5.84471
CVU_carb_5065	111389		4874	8	4870	0	1485.09	16.3252	Sercon 20-22, Penryn	2020-01-05	1.01295	-4.42089
CVU_carb_4543	78997		4879	0	4874	8	1486.46	21.4073	Sercon 20-22, Penryn	2019-02-10	1.69746	-4.99419
CVU_carb_5066	111390		4883	8	4879	0	1487.83	14.1592	Sercon 20-22, Penryn	2020-01-05	1.27376	-4.00053
CVU_carb_4331	78998		4888	8	4883	8	1489.3	21.1527	Sercon 20-22, Penryn	2019-01-22	1.42978	-4.05796
CVU_carb_4629	78999		4893	4	4888	8	1490.78	18.1757	Sercon 20-22, Penryn	2019-02-13	0.970001	-4.4355
CVU_carb_4544	79008		4898	1	4893	4	1492.21	31.5038	Sercon 20-22, Penryn	2019-02-10	1.02724	-5.11352
CVU_carb_4545	79009		4902	8	4898	1	1493.63	57.0987	Sercon 20-22, Penryn	2019-02-10	-2.5542	-5.20469
CVU_carb_5067	111391		4907	6	4902	8	1495.07	13.1959	Sercon 20-22, Penryn	2020-01-05	0.684642	-4.72567
CVU_carb_5068	111392		4913	1	4907	6	1496.66	10.4958	Sercon 20-22, Penryn	2020-01-05	0.113572	-4.45929
CVU_carb_5069	111393		4918	0	4913	1	1498.26	11.6291	Sercon 20-22, Penryn	2021-01-26	0.624677	-4.87732
CVU_carb_4170	79010		4922	10	4918	0	1499.74	13.7	Sercon 20-22, Penryn	2018-10-02	-0.03	-4.02
CVU_carb_5070	111394		4927	4	4922	10	1501.17	11.5112	Sercon 20-22, Penryn	2021-01-26	0.536583	-5.33016
CVU_carb_5071	111395		4932	4	4927	4	1502.61	17.2959	Sercon 20-22, Penryn	2021-01-26	1.14358	-6.37332
CVU_carb_4546	79011		4937	0	4932	4	1504.09	13.9304	Sercon 20-22, Penryn	2019-02-10	2.24894	-5.33766
CVU_carb_5072	111396		4941	10	4937	0	1505.53	14.5813	Sercon 20-22, Penryn	2021-01-26	1.30865	-4.63032
CVU_carb_5073	111397		4946	5	4941	10	1506.97	15.4641	Sercon 20-22, Penryn	2021-01-26	2.12998	-5.54036
CVU_carb_5074	111398		4951	0	4945	5	1508.21	14.1258	Sercon 20-22, Penryn	2021-01-26	1.97785	-5.40333
CVU_carb_4547	79012		4955	10	4951	0	1509.8	41.4322	Sercon 20-22, Penryn	2019-02-10	1.44023	-6.22317
CVU_carb_4548	79013		4960	7	4955	10	1511.26	25.0537	Sercon 20-22, Penryn	2019-02-10	1.96824	-4.95398
CVU_carb_4549	79014		4965	1	4960	7	1512.67	29.1152	Sercon 20-22, Penryn	2019-02-10	2.76039	-5.17688
CVU_carb_5075	111399		4969	10	4965	1	1514.08	34.4453	Sercon 20-22, Penryn	2021-01-26	2.05468	-4.87517
CVU_carb_5076	111400		4974	4	4969	10	1515.49	29.7587	Sercon 20-22, Penryn	2021-01-26	2.67309	-5.52923
CVU_carb_4630	79015		4978	11	4974	4	1516.88	34.0411	Sercon 20-22, Penryn	2019-02-13	2.45234	-5.63364
CVU_carb_5077	111401		4983	6	4978	11	1518.27	28.5482	Sercon 20-22, Penryn	2021-01-26	2.04493	-4.76793
CVU_carb_4631	79016		4988	1	4983	6	1519.67	27.8383	Sercon 20-22, Penryn	2019-02-13	2.35262	-4.48731
CVU_carb_4632	79017		4992	10	4988	1	1521.09	48.4204	Sercon 20-22, Penryn	2019-02-13	3.32806	-5.59519
CVU_carb_5078	111402		4997	4	4992	10	1522.5	31.6458	Sercon 20-22, Penryn	2021-01-26	3.56675	-5.02927
CVU_carb_5079	111403		5002	2	4997	4	1523.92	32.1103	Sercon 20-22, Penryn	2021-01-26	2.03896	-4.49657
CVU_carb_5080	111404		5006	10	5002	2	1525.37	51.0129	Sercon 20-22, Penryn	2021-01-26	2.36099	-4.5285
CVU_carb_5081	111405		5011	4	5006	10	1526.77	33.2925	Sercon 20-22, Penryn	2021-01-26	2.91643	-5.00291
CVU_carb_5082	111406		5016	0	5011	4	1528.17	73.0246	Sercon 20-22, Penryn	2021-01-26	2.72379	-3.51019
CVU_carb_5083	111407		5020	7	5016	0	1529.58	73.9127	Sercon 20-22, Penryn	2021-01-26	3.04127	-3.23733
CVU_carb_5084	111408		5025	4	5020	7	1531	42.197	Sercon 20-22, Penryn	2021-01-26	2.75209	-4.65538
CVU_carb_5085	111409		5029	11	5025	4	1532.42	61.6235	Sercon 20-22, Penryn	2021-01-26	1.56209	-4.21077
CVU_carb_5086	111410		5034	7	5029	11	1533.83	36.264	Sercon 20-22, Penryn	2021-01-26	2.99455	-4.47072
CVU_carb_5087	111411		5039	3	5034	7	1535.25	43.4212	Sercon 20-22, Penryn	2021-01-26	1.92105	-4.32295
CVU_carb_5088	111412		5044	1	5039	3	1536.7	29.0201	Sercon 20-22, Penryn	2021-01-26	2.21651	-4.44413
CVU_carb_4550	79018		5048	9	5044	1	1538.15	38.9585	Sercon 20-22, Penryn	2019-02-10	0.541704	-3.87854
CVU_carb_5089	111413		5053	3	5048	9	1539.54	23.3042	Sercon 20-22, Penryn	2021-01-26	1.52942	-4.17926
CVU_carb_5090	111414		5057	10	5053	3	1540.93	23.4583	Sercon 20-22, Penryn	2021-01-26	1.329	-4.92379
CVU_carb_4551	79019		5062	6	5057	10	1542.34	36.6541	Sercon 20-22, Penryn	2019-02-10	0.968914	-4.94617
CVU_carb_4552	79020		5067	3	5062	6	1543.77	47.4876	Sercon 20-22, Penryn	2019-02-10	0.221852	-5.86474
CVU_carb_4633	79021		5072	3	5067	3	1545.26	14.1384	Sercon 20-22, Penryn	2019-02-13	-0.0227466	-4.12586
CVU_carb_4634	79022		5077	0	5072	3	1546.75	32.4643	Sercon 20-22, Penryn	2019-02-13	0.271816	-4.82784
CVU_carb_5091	111415		5081	7	5077	0	1548.17	17.7564	Sercon 20-22, Penryn	2021-01-26	-0.145602	-4.60773
CVU_carb_4553	79023		5086	4	5081	7	1549.59	9.88749	Sercon 20-22, Penryn	2019-02-10	-0.491354	-3.93056
CVU_carb_5092	111416		5091	0	5086	4	1551.03	9.22613	Sercon 20-22, Penryn	2021-01-26	-0.782922	-4.46274
CVU_carb_4635	79024		5095	7	5091	0	1552.44	23.9043	Sercon 20-22, Penryn	2019-02-13	0.764111	-5.01868
CVU_carb_4636	79025		5100	6	5095	7	1553.88	20.7211	Sercon 20-22, Penryn	2019-02-13	0.497181	-4.58519
CVU_carb_4637	79026		5105	0	5100	6	1555.32	16.2819	Sercon 20-22, Penryn	2019-02-13	-0.0669027	-3.98289
CVU_carb_5093	111417		5109	9	5105	0	1556.73	11.252	Sercon 20-22, Penryn	2021-01-26	-0.270404	-4.56392
CVU_carb_4638	79027		5114	4	5109	9	1558.15	11.6613	Sercon 20-22, Penryn	2019-02-13	-0.296058	-4.23512
CVU_carb_4639	79028		5119	2	5114	4	1559.59	17.6465	Sercon 20-22, Penryn	2019-02-13	0.915087	-4.19535
CVU_carb_5094	111418		5123	8	5119	2	1561.01	17.3228	Sercon 20-22, Penryn	2021-01-26	0.444039	-4.16417
CVU_carb_4554	79029		5128	1	5123	8	1562.37	17.7654	Sercon 20-22, Penryn	2019-02-10	1.38764	-4.32294
CVU_carb_4555	79030		5132	10	5128	1	1563.76	53.7466	Sercon 20-22, Penryn	2019-02-10	0.485773	-5.958
CVU_carb_5095	111419		5137	2	5132	10	1565.15	22.7369	Sercon 20-22, Penryn	2021-01-26	0.647714	-4.34331
CVU_carb_4556	79031		5141	6	5137	2	1566.47	23.1102	Sercon 20-22, Penryn	2019-02-10	0.44133	-4.43106
CVU_carb_5096	111420		5145	0	5141	1	1567.6	36.8124	Sercon 20-22, Penryn	2021-01-26	0.594757	-4.98071
CVU_carb_4640	79032		5149	4	5145	7	1568.95	35.0647	Sercon 20-22, Penryn	2019-02-13	0.708767	-4.38798
CVU_carb_4641	79033		5153	6	5149	4	1570.15	19.6312	Sercon 20-22, Penryn	2019-02-13	0.0582384	-4.48005
CVU_carb_5097	111421		5157	9	5153	6	1571.43	17.6182	Sercon 20-22, Penryn	2021-01-26	0.2761	-4.43843
CVU_carb_5098	111422		5162	2	5157	9	1572.76	12.5512	Sercon 20-22, Penryn	2021-01-26	-0.673026	-4.09396
CVU_carb_5099	111423		5166	6	5162	2	1574.09	11.6995	Sercon 20-22, Penryn	2021-01-26	-0.601868	-4.52516
CVU_carb_4642	79034		5171	0	5166	6	1575.43	20.2152	Sercon 20-22, Penryn	2019-02-13	0.0394243	-3.81902
CVU_carb_5100	111424		5175	2	5171	0	1576.76	17.8188	Sercon 20-22, Penryn	2021-01-26	-0.0199765	-4.18017
CVU_carb_4557	79035		5179	6	5175	4	1578.08	32.9627	Sercon 20-22, Penryn	2019-02-10	0.937851	-4.67541
CVU_carb_4643	79036		5184	6	5179	6	1579.47	44.1413	Sercon 20-22, Penryn	2019-02-13	0.91874	-4.19106
CVU_carb_5101	111425		5189	6	5184	6	1581	32.7057	Sercon 20-22, Penryn	2021-01-26	1.10311	-4.9016
CVU_carb_5102	111426		5194	2	5189	6	1582.47	37.9063	Sercon 20-22, Penryn	2021-01-26	0.666244	-4.67518
CVU_carb_4644	79037		5198	6	5194	2	1583.84	62.2175	Sercon 20-22, Penryn	2019-02-13	0.0678683	-4.49767
CVU_carb_4333	79038		5203	3	5198	6	1585.23	42.5616	Sercon 20-22, Penryn	2019-01-22	1.00777	-4.23337
CVU_carb_5103	111427		5207	11	5203	3	1586.66	37.3736	Sercon 20-22, Penryn	2021-01-26	0.918094	-4.20809
CVU_carb_4558	79039		5212	7	5207	11	1588.08	37.137	Sercon 20-22, Penryn	2019-02-10	1.16588	-4.42267
CVU_carb_5104	111428		5217	3	5212	7	1589.51	37.6226	Sercon 20-22, Penryn	2021-01-26	1.41768	-4.36105
CVU_carb_4559	79040		5220	0	5217	3	1590.64	45.2021	Sercon 20-22, Penryn	2019-02-10	1.22777	-4.54223
CVU_carb_4560	79041		5226	8	5222	0	1592.38	60.3562	Sercon 20-22, Penryn	2019-02-10	1.16157	-5.14325
CVU_carb_5105	111429		5226	8	5222	0	1592.38	56.4238	Sercon 20-22, Penryn	2021-01-26	1.19935	-4.93509
CVU_carb_4561	79042		5231	7	5226	8	1593.84	50.8164	Sercon 20-22, Penryn	2019-02-10	0.618087	-4.75441
CVU_carb_5106	111430		5231	7	5226	8	1593.84	56.565	Sercon 20-22, Penryn	2021-01-26	0.972058	-4.89626
CVU_carb_4562	79043		5236	4	5231	7	1595.31	52.405	Sercon 20-22, Penryn	2019-02-10	0.738226	-4.85514
CVU_carb_4563	79044		5241	0	5236	4	1596.75	68.976	Sercon 20-22, Penryn	2019-02-10	0.329069	-4.45825
CVU_carb_5107	111431		5245	7	5241	0	1598.16	30.3913	Sercon 20-22, Penryn	2021-01-26	1.08925	-4.13835
CVU_carb_4564	79045		5250	3	5245	7	1599.57	52.854	Sercon 20-22, Penryn	2019-02-10	0.880196	-5.17156
CVU_carb_4565	79046		5254	10	5250	3	1600.97	57.2103	Sercon 20-22, Penryn	2019-02-10	0.777087	-4.91259
CVU_carb_5108	111462		5259	8	5254	10	1602.41	31.1671	Sercon 20-22, Penryn	2021-01-26	0.831328	-4.67635
CVU_carb_5109	111463		5264	4	5259	8	1603.86	26.4434	Sercon 20-22, Penryn	2021-01-26	0.804458	-4.74429
CVU_carb_5110	111504		5269	0	5264	4	1605.28	24.3099	Sercon 20-22, Penryn	2021-01-26	-0.27905	-4.38877
CVU_carb_5111	111505		5274	0	5269	0	1606.75	20.5983	Sercon 20-22, Penryn	2021-01-26	-0.226189	-4.65773
CVU_carb_4566	79047		5278	8	5274	0	1608.23	19.9046	Sercon 20-22, Penryn	2019-02-10	-4.29502	-2.7603
CVU_carb_4645	79048		5283	8	5278	8	1609.7	29.2246	Sercon 20-22, Penryn	2019-02-13	0.813096	-4.68271
CVU_carb_4646	79049		5288	4	5283	8	1611.17	30.036	Sercon 20-22, Penryn	2019-02-13	0.66227	-4.46711
CVU_carb_5112	111506		5293	0	5288	4	1612.6	26.3303	Sercon 20-22, Penryn	2021-01-26	0.701065	-4.5495
CVU_carb_5113	111507		5297	10	5293	0	1614.04	40.7629	Sercon 20-22, Penryn	2021-01-26	0.917321	-4.93326
CVU_carb_5114	111508		5302	9	5297	10	1615.53	34.1084	Sercon 20-22, Penryn	2021-01-26	1.01785	-4.7137
CVU_carb_5115	111509		5307	4	5302	9	1616.98	28.4945	Sercon 20-22, Penryn	2021-01-26	0.229169	-4.6165
CVU_carb_5116	111510		5312	4	5307	4	1618.44	33.3825	Sercon 20-22, Penryn	2021-01-26	0.865436	-4.80946
CVU_carb_4567	79050		5317	2	5312	4	1619.94	46.3373	Sercon 20-22, Penryn	2019-02-10	1.43734	-4.93229
CVU_carb_4568	79051		5322	5	5317	2	1621.47	70.1195	Sercon 20-22, Penryn	2019-02-10	1.48667	-4.28452
CVU_carb_5117	111511		5327	3	5322	5	1623.01	45.0245	Sercon 20-22, Penryn	2021-01-26	1.28354	-3.56905
CVU_carb_5118	111512		5332	3	5327	3	1624.51	44.4127	Sercon 20-22, Penryn	2021-01-26	1.52259	-5.17204
CVU_carb_4569	79052		5337	1	5332	3	1626.01	42.5694	Sercon 20-22, Penryn	2019-02-10	1.95481	-4.67547
CVU_carb_5119	111513		5342	0	5337	1	1627.49	66.2244	Sercon 20-22, Penryn	2021-01-26	1.96917	-4.43955
CVU_carb_4570	79053		5346	8	5342	0	1628.95	78.1059	Sercon 20-22, Penryn	2019-02-10	1.79797	-4.43587
CVU_carb_5120	111514		5351	6	5346	8	1630.4	36.8082	Sercon 20-22, Penryn	2021-01-26	2.2795	-4.47819
CVU_carb_5121	111515		5356	4	5351	6	1631.87	42.55	Sercon 20-22, Penryn	2021-01-26	2.41403	-4.7564
CVU_carb_5122	111516		5361	0	5356	4	1633.32	36.1361	Sercon 20-22, Penryn	2021-01-26	2.30102	-4.37993
CVU_carb_4571	79054		5365	10	5361	0	1634.77	57.9168	Sercon 20-22, Penryn	2019-02-10	1.65372	-4.52727
CVU_carb_5123	111517		5369	10	5365	10	1636.12	54.4959	Sercon 20-22, Penryn	2021-01-26	1.72531	-4.10444
CVU_carb_4572	79055		5374	6	5369	10	1637.44	59.3311	Sercon 20-22, Penryn	2019-02-10	1.67496	-4.25739
CVU_carb_5124	111518		5379	4	5374	6	1638.88	75.7619	Sercon 20-22, Penryn	2021-01-26	2.32678	-3.21344
CVU_carb_5125	111519		5384	2	5379	4	1640.36	52.7082	Sercon 20-22, Penryn	2021-01-26	1.96136	-3.82283
CVU_carb_5126	111520		5389	1	5384	2	1641.84	39.3135	Sercon 20-22, Penryn	2021-01-26	1.57841	-3.96188
CVU_carb_5127	111521		5394	0	5389	1	1643.34	81.6486	Sercon 20-22, Penryn	2021-01-26	2.59066	-2.97279
CVU_carb_5128	111522		5398	8	5394	0	1644.8	43.1736	Sercon 20-22, Penryn	2021-01-26	1.86662	-4.72634
CVU_carb_4573	79056		5403	3	5398	9	1646.22	89.1471	Sercon 20-22, Penryn	2019-02-10	2.31781	-3.43041
CVU_carb_5129	111523		5408	0	5403	3	1647.63	60.2238	Sercon 20-22, Penryn	2021-01-26	1.62732	-4.62611
CVU_carb_5130	111524		5412	9	5408	0	1649.08	38.4605	Sercon 20-22, Penryn	2021-01-26	1.51989	-3.44392
CVU_carb_5131	111525		5417	4	5412	9	1650.5	28.6009	Sercon 20-22, Penryn	2021-01-26	1.58046	-4.0746
CVU_carb_5132	111526		5422	1	5417	4	1651.93	37.7969	Sercon 20-22, Penryn	2021-01-26	1.89901	-4.25347
CVU_carb_4574	79057		5426	8	5422	1	1653.35	82.3495	Sercon 20-22, Penryn	2019-02-10	1.66209	-3.06459
CVU_carb_5133	111527		5426	8	5422	1	1653.35	56.4581	Sercon 20-22, Penryn	2021-01-26	1.12476	-3.32639
CVU_carb_5134	111528		5431	8	5426	8	1654.81	87.1256	Sercon 20-22, Penryn	2021-01-26	1.65898	-2.22041
CVU_carb_4575	79058		5436	4	5431	8	1656.28	88.211	Sercon 20-22, Penryn	2019-02-10	1.33077	-2.84106
CVU_carb_4576	79059		5441	0	5436	4	1657.71	93.9934	Sercon 20-22, Penryn	2019-02-10	1.71507	-2.30613
CVU_carb_5135	111529		5445	4	5441	0	1659.08	44.5571	Sercon 20-22, Penryn	2021-01-26	0.958691	-3.02332
CVU_carb_5136	111530		5449	9	5445	4	1660.41	29.5393	Sercon 20-22, Penryn	2021-01-26	1.29598	-3.61232
CVU_carb_4577	79060		5454	7	5449	9	1661.82	77.2756	Sercon 20-22, Penryn	2019-02-10	2.05766	-4.00252
CVU_carb_5138	111532		5459	3	5454	7	1663.27	56.4675	Sercon 20-22, Penryn	2021-01-26	1.30906	-3.7679
CVU_carb_5137	111531		5464	1	5459	3	1664.72	39.4218	Sercon 20-22, Penryn	2021-01-26	1.25582	-3.42438
CVU_carb_5139	111533		5469	0	5464	1	1666.2	54.1963	Sercon 20-22, Penryn	2021-01-26	-0.361751	-3.49592
CVU_carb_5140	111534		5473	8	5469	0	1667.66	36.4314	Sercon 20-22, Penryn	2021-01-26	1.67483	-4.50381
CVU_carb_4578	79061		5476	2	5473	6	1668.73	39.4479	Sercon 20-22, Penryn	2019-02-10	1.16493	-4.62915
CVU_carb_5141	111535		5489	4	5484	9	1672.45	66.4555	Sercon 20-22, Penryn	2021-01-26	1.58609	-5.01376
CVU_carb_5142	111536		5494	1	5489	4	1673.87	70.432	Sercon 20-22, Penryn	2021-01-26	1.56213	-4.03966
CVU_carb_5143	111537		5499	0	5494	2	1675.36	34.978	Sercon 20-22, Penryn	2021-01-26	0.935371	-4.082
CVU_carb_5144	111538		5508	9	5499	0	1677.58	32.9703	Sercon 20-22, Penryn	2021-01-26	1.19715	-4.00418
CVU_carb_5145	111539		5513	10	5508	9	1679.84	41.3975	Sercon 20-22, Penryn	2021-01-26	1.05501	-3.9957
CVU_carb_5146	111540		5518	3	5513	10	1681.29	55.1326	Sercon 20-22, Penryn	2021-01-26	0.397859	-3.92853
CVU_carb_4579	79062		5523	0	5518	3	1682.69	89.4469	Sercon 20-22, Penryn	2019-02-10	1.19838	-2.70189
CVU_carb_5147	111541		5527	6	5523	0	1684.1	50.9555	Sercon 20-22, Penryn	2021-01-26	0.593922	-2.8998
CVU_carb_4580	79063		5531	10	5527	6	1685.44	78.9088	Sercon 20-22, Penryn	2019-02-10	1.1342	-2.95379
CVU_carb_5148	111542		5536	4	5531	10	1686.79	70.8486	Sercon 20-22, Penryn	2021-01-26	0.98222	-3.37601
CVU_carb_5149	111543		5540	11	5536	4	1688.17	49.6721	Sercon 20-22, Penryn	2021-01-27	0.0648123	-3.94615
CVU_carb_5150	111544		5545	4	5540	11	1689.54	85.0927	Sercon 20-22, Penryn	2021-01-27	0.543958	-2.69518
CVU_carb_4581	79064		5550	0	5545	4	1690.93	60.8286	Sercon 20-22, Penryn	2019-02-10	0.327005	-4.06371
CVU_carb_5151	111545		5555	0	5550	0	1692.4	21.8352	Sercon 20-22, Penryn	2021-01-27	0.764904	-4.19818
CVU_carb_5152	111546		5560	0	5555	0	1693.93	17.5378	Sercon 20-22, Penryn	2021-01-27	-0.327558	-4.31972
CVU_carb_5153	111547		5565	1	5560	0	1695.46	14.5701	Sercon 20-22, Penryn	2021-01-27	-0.203598	-4.94821
CVU_carb_5154	111548		5569	9	5565	1	1696.95	32.6538	Sercon 20-22, Penryn	2021-01-27	0.742985	-4.90784
CVU_carb_5155	111549		5574	7	5569	9	1698.4	32.0259	Sercon 20-22, Penryn	2021-01-27	0.369366	-4.68947
CVU_carb_5156	111550		5579	4	5574	7	1699.86	23.7501	Sercon 20-22, Penryn	2021-01-27	0.290947	-4.20251
CVU_carb_4444	79065		5584	2	5579	2	1701.29	58.3736	Sercon 20-22, Penryn	2019-02-06	0.565105	-4.67532
CVU_carb_4582	79066		5584	2	5579	2	1701.29	52.7597	Sercon 20-22, Penryn	2019-02-10	0.59446	-4.23909
CVU_carb_5157	111551		5589	0	5584	4	1702.82	26.6445	Sercon 20-22, Penryn	2021-01-27	0.24057	-4.63868
CVU_carb_4445	79067		5593	11	5589	0	1704.28	43.6743	Sercon 20-22, Penryn	2019-02-06	0.441401	-4.34326
CVU_carb_5158	111552		5593	11	5589	0	1704.28	34.2583	Sercon 20-22, Penryn	2021-01-27	0.622379	-4.52624
CVU_carb_5159	111553		5598	9	5593	11	1705.76	48.8408	Sercon 20-22, Penryn	2021-01-27	0.21832	-4.55814
CVU_carb_4147	79068		5603	6	5598	9	1707.22	25.8699	Sercon 20-22, Penryn	2018-09-07	0.566805	-5.65092
CVU_carb_4583	79069		5608	0	5603	6	1708.63	88.8784	Sercon 20-22, Penryn	2019-02-10	0.474763	-4.34165
CVU_carb_5160	111554		5608	0	5603	6	1708.63	30.9644	Sercon 20-22, Penryn	2021-01-27	0.865324	-4.0925
CVU_carb_5161	111555		5612	10	5608	0	1710.06	34.611	Sercon 20-22, Penryn	2021-01-27	0.506784	-4.24205
CVU_carb_4584	79070		5617	6	5612	10	1711.5	60.0886	Sercon 20-22, Penryn	2019-02-10	0.643922	-4.60056
CVU_carb_4648	79072		5622	5	5617	6	1712.96	29.059	Sercon 20-22, Penryn	2019-02-13	0.569597	-4.18811
CVU_carb_5162	111556		5626	10	5622	5	1714.39	31.5374	Sercon 20-22, Penryn	2021-01-27	0.680472	-5.25352
CVU_carb_5163	111557		5631	8	5626	10	1715.8	33.9904	Sercon 20-22, Penryn	2021-01-27	1.10525	-5.08071
CVU_carb_4647	79071		5636	4	5631	8	1717.24	30.3203	Sercon 20-22, Penryn	2019-02-13	0.618509	-4.43667
CVU_carb_5164	111558		5636	4	5631	8	1717.24	39.8447	Sercon 20-22, Penryn	2021-01-27	0.711093	-4.36597
CVU_carb_4649	79073		5641	0	5636	4	1718.67	23.19	Sercon 20-22, Penryn	2019-02-13	0.504233	-4.27901
CVU_carb_5165	111559		5641	0	5636	4	1718.67	31.4757	Sercon 20-22, Penryn	2021-01-27	0.607476	-4.57344
CVU_carb_4650	79074		5645	6	5641	0	1720.06	32.2147	Sercon 20-22, Penryn	2019-02-13	0.604262	-3.96763
CVU_carb_5166	111560		5645	6	5641	0	1720.06	35.733	Sercon 20-22, Penryn	2021-01-27	0.681153	-4.12815
CVU_carb_5167	111561		5650	4	5645	6	1721.49	52.4486	Sercon 20-22, Penryn	2021-01-27	1.129	-2.72582
CVU_carb_5168	111562		5658	8	5655	2	1724.23	45.6603	Sercon 20-22, Penryn	2021-01-27	0.596874	-3.60601
CVU_carb_5169	111563		5667	0	5662	4	1726.59	41.2663	Sercon 20-22, Penryn	2021-01-27	0.686005	-3.70975
CVU_carb_4585	79075		5671	8	5667	0	1728.01	83.1371	Sercon 20-22, Penryn	2019-02-10	1.24665	-3.20733
CVU_carb_5170	111564		5676	6	5671	8	1729.46	47.697	Sercon 20-22, Penryn	2021-01-27	0.995855	-3.52185
CVU_carb_5171	111565		5681	4	5676	6	1730.93	51.5059	Sercon 20-22, Penryn	2021-01-27	0.96883	-3.86356
CVU_carb_5172	111566		5682	6	5681	4	1731.85	43.3379	Sercon 20-22, Penryn	2021-01-27	0.503305	-3.95007
CVU_carb_5173	111567		5695	0	5691	4	1735.28	42.1002	Sercon 20-22, Penryn	2021-01-27	1.04528	-4.45116
CVU_carb_5174	111568		5710	10	5706	0	1739.93	66.6721	Sercon 20-22, Penryn	2021-01-27	1.56054	-4.42995
CVU_carb_5175	111569		5715	6	5710	10	1741.37	45.6379	Sercon 20-22, Penryn	2021-01-27	1.38479	-4.9462
CVU_carb_5176	111570		5720	4	5715	6	1742.82	53.6826	Sercon 20-22, Penryn	2021-01-27	0.830298	-4.3397
CVU_carb_4586	79076		5725	0	5720	4	1744.27	87.0467	Sercon 20-22, Penryn	2019-02-10	1.62358	-3.2493
CVU_carb_5177	111571		5729	11	5725	0	1745.73	44.3179	Sercon 20-22, Penryn	2021-01-27	1.07452	-4.3097
CVU_carb_5178	111572		5734	8	5729	11	1747.2	81.7191	Sercon 20-22, Penryn	2021-01-27	1.76025	-3.41726
CVU_carb_5179	111573		5739	7	5734	8	1748.68	41.1096	Sercon 20-22, Penryn	2021-01-27	1.24233	-3.85351
CVU_carb_5180	111574		5744	2	5739	7	1750.12	50.4218	Sercon 20-22, Penryn	2021-01-27	0.875815	-4.29095
CVU_carb_5181	111575		5749	0	5744	2	1751.56	55.9621	Sercon 20-22, Penryn	2021-01-27	0.811477	-3.24888
CVU_carb_5182	111576		5753	0	5749	0	1752.9	57.5706	Sercon 20-22, Penryn	2021-01-27	0.996656	-3.72738
CVU_carb_5183	111577		5759	4	5753	10	1754.61	55.892	Sercon 20-22, Penryn	2021-01-27	1.43464	-3.53799
CVU_carb_5184	111578		5773	0	5769	0	1759	47.0869	Sercon 20-22, Penryn	2021-01-27	0.879308	-4.4594
CVU_carb_5185	111579		5777	10	5773	0	1760.35	54.0131	Sercon 20-22, Penryn	2021-01-27	1.3806	-4.36281
CVU_carb_5186	111580		5782	6	5777	10	1761.79	57.6749	Sercon 20-22, Penryn	2021-01-27	1.2048	-3.94435
CVU_carb_4587	79077		5787	0	5782	4	1763.17	49.7819	Sercon 20-22, Penryn	2019-02-10	0.780453	-3.12197
CVU_carb_4588	79078		5791	8	5787	0	1764.59	67.0076	Sercon 20-22, Penryn	2019-02-10	1.56123	-3.29449
CVU_carb_5187	111581		5796	2	5791	8	1765.99	80.9478	Sercon 20-22, Penryn	2021-01-27	1.8629	-3.2658
CVU_carb_5188	111582		5800	0	5796	2	1767.26	56.6901	Sercon 20-22, Penryn	2021-01-27	1.7908	-3.98202
CVU_carb_5189	111583		5804	8	5800	0	1768.55	52.3961	Sercon 20-22, Penryn	2021-01-27	1.17368	-3.25724
CVU_carb_5190	111584		5809	4	5804	8	1769.97	45.4872	Sercon 20-22, Penryn	2021-01-27	1.37661	-3.92136
CVU_carb_5191	111585		5814	4	5809	4	1771.45	84.8338	Sercon 20-22, Penryn	2021-01-27	1.66903	-2.37162
CVU_carb_5192	111586		5818	11	5814	4	1772.91	56.0133	Sercon 20-22, Penryn	2021-01-27	1.49505	-4.29499
CVU_carb_5193	111587		5823	5	5818	11	1774.29	61.6874	Sercon 20-22, Penryn	2021-01-27	1.6731	-4.05582
CVU_carb_5194	111588		5827	11	5823	3	1775.64	46.8377	Sercon 20-22, Penryn	2021-01-27	0.694091	-3.4921
CVU_carb_5195	111589		5832	4	5827	11	1777.02	82.0591	Sercon 20-22, Penryn	2021-01-27	1.59171	-3.12068
CVU_carb_5196	111590		5836	11	5832	4	1778.39	88.1738	Sercon 20-22, Penryn	2021-01-27	1.72626	-2.21669
CVU_carb_5197	111591		5841	8	5836	11	1779.82	77.7766	Sercon 20-22, Penryn	2021-01-27	1.26281	-3.81516
CVU_carb_4589	79091		5846	5	5841	8	1781.26	83.0959	Sercon 20-22, Penryn	2019-02-10	1.43319	-3.15865
CVU_carb_5198	111592		5851	3	5846	5	1782.72	57.4098	Sercon 20-22, Penryn	2021-01-27	0.939688	-3.70967
CVU_carb_4590	79092		5855	11	5851	3	1784.17	46.5118	Sercon 20-22, Penryn	2019-02-10	0.85587	-2.69833
CVU_carb_4591	79093		5860	4	5855	11	1785.56	89.5046	Sercon 20-22, Penryn	2019-02-10	1.27845	-2.19711
CVU_carb_5199	111593		5865	2	5860	4	1786.97	51.7968	Sercon 20-22, Penryn	2021-01-27	0.829761	-2.9994
CVU_carb_5200	111594		5869	11	5865	2	1788.43	72.575	Sercon 20-22, Penryn	2021-01-27	0.973342	-3.19612
CVU_carb_5201	111595		5874	8	5869	11	1789.87	40.2936	Sercon 20-22, Penryn	2021-01-27	0.394648	-3.90494
CVU_carb_5202	111596		5879	4	5874	8	1791.31	47.6615	Sercon 20-22, Penryn	2021-01-27	0.519085	-3.50321
CVU_carb_5203	111597		5884	2	5879	4	1792.76	36.8099	Sercon 20-22, Penryn	2021-01-27	-0.0196113	-3.5049
CVU_carb_5204	111598		5888	10	5884	2	1794.21	76.1044	Sercon 20-22, Penryn	2021-01-27	0.69674	-3.04681
CVU_carb_5205	111599		5893	3	5888	10	1795.59	26.8343	Sercon 20-22, Penryn	2021-01-27	0.0128318	-3.31914
CVU_carb_5206	111600		5898	0	5893	3	1796.99	79.0686	Sercon 20-22, Penryn	2021-01-27	0.687036	-2.7998
CVU_carb_5207	111601		5902	8	5898	0	1798.42	27.7948	Sercon 20-22, Penryn	2021-01-27	0.445398	-3.57315
CVU_carb_5208	111602		5907	0	5902	8	1799.79	37.6378	Sercon 20-22, Penryn	2021-01-27	0.46684	-3.59216
CVU_carb_5209	111603		5911	3	5907	0	1801.1	43.2822	Sercon 20-22, Penryn	2021-01-27	-0.163932	-2.74792
CVU_carb_5210	111604		5916	0	5911	3	1802.47	28.5542	Sercon 20-22, Penryn	2021-01-27	0.151216	-4.05061
CVU_carb_5211	111605		5920	8	5916	0	1803.91	30.6312	Sercon 20-22, Penryn	2021-01-27	0.399903	-4.19481
CVU_carb_5212	111606		5925	0	5920	8	1805.28	23.418	Sercon 20-22, Penryn	2021-01-27	0.0694699	-4.43354
CVU_carb_5213	111607		5929	6	5925	0	1806.63	24.6896	Sercon 20-22, Penryn	2021-01-27	0.288712	-3.04054
CVU_carb_5214	111608		5934	2	5929	6	1808.02	43.3706	Sercon 20-22, Penryn	2021-01-27	0.438967	-3.70999
CVU_carb_5215	111609		5938	10	5934	2	1809.45	41.8419	Sercon 20-22, Penryn	2021-01-27	0.136029	-3.52516
CVU_carb_5216	111610		5943	4	5938	10	1810.84	82.5866	Sercon 20-22, Penryn	2021-01-27	1.19304	-2.53483
CVU_carb_5217	111611		5948	2	5943	4	1812.26	34.0015	Sercon 20-22, Penryn	2021-01-27	0.33049	-3.85701
CVU_carb_5218	111612		5953	2	5948	2	1813.76	84.2511	Sercon 20-22, Penryn	2021-01-27	1.12023	-2.50949
CVU_carb_5219	111613		5957	10	5953	2	1815.24	36.0857	Sercon 20-22, Penryn	2021-01-27	0.298619	-3.40448
CVU_carb_5220	111614		5962	4	5957	10	1816.63	84.4974	Sercon 20-22, Penryn	2021-01-27	1.24109	-2.41232
CVU_carb_5221	111615		5967	0	5962	4	1818.03	58.4014	Sercon 20-22, Penryn	2021-01-27	0.74035	-3.24716
CVU_carb_4592	79094		5971	10	5967	0	1819.48	85.6574	Sercon 20-22, Penryn	2019-02-10	1.08708	-2.86872
CVU_carb_4593	79095		5971	10	5967	0	1819.48	89.3386	Sercon 20-22, Penryn	2019-02-10	1.10875	-2.28147
CVU_carb_5222	111616		5976	8	5971	10	1820.95	32.8438	Sercon 20-22, Penryn	2021-01-27	0.227063	-3.64414
CVU_carb_5223	111617		5981	6	5976	8	1822.42	85.2305	Sercon 20-22, Penryn	2021-01-27	1.22011	-2.46203
CVU_carb_5224	111618		5986	3	5981	6	1823.89	41.8065	Sercon 20-22, Penryn	2021-01-27	0.506106	-3.38079
CVU_carb_5225	111619		5990	11	5986	3	1825.32	37.2039	Sercon 20-22, Penryn	2021-01-27	0.208446	-3.14559
CVU_carb_5226	111620		5995	0	5990	10	1826.64	60.4789	Sercon 20-22, Penryn	2021-01-27	0.979141	-3.16552
CVU_carb_5227	111621		5999	8	5995	0	1827.99	33.2026	Sercon 20-22, Penryn	2021-01-27	0.118213	-3.686
CVU_carb_5228	111622		6004	4	5999	8	1829.41	86.5814	Sercon 20-22, Penryn	2021-01-27	1.19098	-2.16133
CVU_carb_5229	111623		6009	3	6004	4	1830.87	39.1839	Sercon 20-22, Penryn	2021-01-28	0.463108	-4.12679
CVU_carb_5230	111624		6013	10	6009	3	1832.32	85.6646	Sercon 20-22, Penryn	2021-01-28	1.31143	-3.0262
CVU_carb_5231	111625		6026	0	6018	6	1835.58	87.4369	Sercon 20-22, Penryn	2021-01-28	0.459623	-2.59639
CVU_carb_5233	111626		6030	8	6026	0	1837.44	35.7327	Sercon 20-22, Penryn	2021-01-28	0.109038	-4.64476
CVU_carb_4598	79100		6035	4	6030	8	1838.86	87.6556	Sercon 20-22, Penryn	2019-02-10	0.968759	-2.43221
CVU_carb_5234	111627		6040	0	6035	4	1840.28	54.7631	Sercon 20-22, Penryn	2021-01-28	0.177066	-4.50142
CVU_carb_5235	111628		6045	0	6040	0	1841.75	33.2803	Sercon 20-22, Penryn	2021-01-28	-0.140965	-4.37914
CVU_carb_5236	111629		6049	8	6045	0	1843.23	28.9954	Sercon 20-22, Penryn	2021-01-28	-0.585496	-4.54904
CVU_carb_5237	111630		6054	4	6049	8	1844.65	33.8214	Sercon 20-22, Penryn	2021-01-28	-0.366658	-4.23115
CVU_carb_5238	111631		6059	0	6054	4	1846.07	71.663	Sercon 20-22, Penryn	2021-01-28	0.911285	-3.3291
CVU_carb_5239	111632		6063	4	6059	0	1847.44	18.4334	Sercon 20-22, Penryn	2021-01-28	-0.392798	-4.95668
CVU_carb_5239	111633		6068	0	6063	4	1848.82	52.6446	Sercon 20-22, Penryn	2021-01-28	0.506952	-3.83743
CVU_carb_5240	111634		6071	0	6068	0	1849.98	50.72	Sercon 20-22, Penryn	2021-01-28	0.599088	-3.76279
CVU_carb_5241	111635		6081	8	6077	0	1852.98	21.907	Sercon 20-22, Penryn	2021-01-28	-0.336184	-4.54101
CVU_carb_5242	111636		6086	7	6081	8	1854.44	44.8489	Sercon 20-22, Penryn	2021-01-28	0.0272091	-3.57736
CVU_carb_5243	111637		6091	5	6086	7	1855.93	73.9845	Sercon 20-22, Penryn	2021-01-28	0.139925	-3.1174
CVU_carb_4597	79099		6096	0	6091	5	1857.36	32.0142	Sercon 20-22, Penryn	2019-02-10	-0.59319	-4.68787
CVU_carb_4596	79098		6100	8	6096	0	1858.77	32.1929	Sercon 20-22, Penryn	2019-02-10	-0.232813	-5.1078
CVU_carb_4595	79097		6105	1	6100	8	1860.16	23.5314	Sercon 20-22, Penryn	2019-02-10	-0.309973	-4.92315
CVU_carb_5244	111638		6109	9	6105	1	1861.54	20.8179	Sercon 20-22, Penryn	2021-01-28	-0.876788	-5.25389
CVU_carb_4594	79096		6111	3	6109	9	1862.48	29.144	Sercon 20-22, Penryn	2019-02-10	-0.198137	-5.49601
CVU_carb_5245	111639		6137	10	6133	0	1870.08	20.9191	Sercon 20-22, Penryn	2021-01-28	-0.0596486	-5.70381
CVU_carb_5246	111640		6142	9	6137	10	1871.56	19.0252	Sercon 20-22, Penryn	2021-01-28	-0.148279	-5.69628
CVU_carb_5247	111641		6147	7	6142	9	1873.05	19.6507	Sercon 20-22, Penryn	2021-01-28	-0.182547	-5.7064
CVU_carb_4599	79101		6152	7	6147	7	1874.55	27.5778	Sercon 20-22, Penryn	2019-02-10	-0.0651052	-4.96056
CVU_carb_4600	79102		6162	8	6157	4	1877.57	24.0364	Sercon 20-22, Penryn	2019-02-10	0.025559	-5.6395
CVU_carb_4601	79103		6167	1	6162	8	1879.05	62.4658	Sercon 20-22, Penryn	2019-02-13	-1.25128	-4.24137
CVU_carb_5248	111642		6172	2	6167	1	1880.5	24.1866	Sercon 20-22, Penryn	2021-01-28	0.0463314	-4.87428
CVU_carb_4175	79104		6176	11	6172	2	1882	18.9	Sercon 20-22, Penryn	2018-10-02	0.04	-4.99
CVU_carb_4602	79105		6181	10	6176	11	1883.47	20.6905	Sercon 20-22, Penryn	2019-02-13	0.132043	-4.97031
CVU_carb_5249	111643		6186	6	6181	10	1884.93	21.531	Sercon 20-22, Penryn	2021-01-28	0.338407	-5.62474
CVU_carb_4603	79106		6191	5	6186	6	1886.39	26.8362	Sercon 20-22, Penryn	2019-02-13	0.0863155	-4.49758
CVU_carb_4651	79107		6196	4	6191	5	1887.89	71.086	Sercon 20-22, Penryn	2019-02-13	-0.447267	-4.35572
CVU_carb_5250	111644		6200	10	6196	2	1889.3	55.4515	Sercon 20-22, Penryn	2021-01-28	-0.037776	-4.40901
CVU_carb_5251	111645		6205	5	6200	10	1890.71	83.2535	Sercon 20-22, Penryn	2021-01-28	0.181946	-3.21025
CVU_carb_5252	111646		6210	4	6205	5	1892.16	37.1332	Sercon 20-22, Penryn	2021-01-28	-0.0929524	-4.08784
CVU_carb_5253	111647		6215	2	6210	4	1893.65	29.0411	Sercon 20-22, Penryn	2021-01-28	0.393273	-4.18881
CVU_carb_5254	111648		6219	6	6215	2	1895.04	31.4049	Sercon 20-22, Penryn	2021-01-28	0.642346	-3.81931
CVU_carb_5255	111649		6224	2	6219	6	1896.41	32.0867	Sercon 20-22, Penryn	2021-01-28	0.79631	-4.15466
CVU_carb_5256	111650		6227	0	6224	2	1897.56	77.7996	Sercon 20-22, Penryn	2021-01-28	0.880509	-3.12279
CVU_carb_5257	111651		6231	10	6227	0	1898.73	49.2721	Sercon 20-22, Penryn	2021-01-28	1.40112	-3.60933
CVU_carb_5258	111652		6236	5	6231	10	1900.16	23.2663	Sercon 20-22, Penryn	2021-01-28	0.678332	-4.60574
CVU_carb_5259	111653		6240	9	6236	5	1901.52	45.3133	Sercon 20-22, Penryn	2021-01-28	0.917781	-2.87207
CVU_carb_5260	111654		6245	7	6240	9	1902.92	27.4241	Sercon 20-22, Penryn	2021-01-28	1.40018	-3.13561
CVU_carb_5261	111655		6250	6	6245	7	1904.4	28.5749	Sercon 20-22, Penryn	2021-01-28	1.17272	-2.78007
CVU_carb_5262	71609		6251	0	6251	0	1905.3	91.0595	Sercon 20-22, Penryn	2021-01-28	2.36759	-1.93
CVU_carb_5263	71610		6252	0	6252	0	1905.61	83.1354	Sercon 20-22, Penryn	2021-01-28	2.11391	-2.93501
CVU_carb_5264	71611		6253	2	6253	2	1905.97	61.5478	Sercon 20-22, Penryn	2021-01-28	1.56041	-3.28579
CVU_carb_5265	71612		6254	2	6254	2	1906.27	72.8926	Sercon 20-22, Penryn	2021-01-28	1.79271	-3.39179
CVU_carb_5266	71613		6255	1	6255	1	1906.55	63.1712	Sercon 20-22, Penryn	2021-01-28	2.27428	-2.38901
CVU_carb_5267	71614		6255	5	6255	5	1906.65	69.5114	Sercon 20-22, Penryn	2021-01-28	-3.96584	-1.17078
CVU_carb_5268	71616		6257	0	6257	0	1907.13	75.2287	Sercon 20-22, Penryn	2021-01-28	-4.06564	-1.25233
CVU_carb_5269	71617		6258	0	6258	0	1907.44	66.6154	Sercon 20-22, Penryn	2021-01-28	-4.26227	-1.38964
CVU_carb_5270	71618		6259	0	6259	0	1907.74	55.3004	Sercon 20-22, Penryn	2021-01-28	-4.1825	-1.86867
CVU_carb_5271	71619		6260	3	6260	3	1908.12	58.2105	Sercon 20-22, Penryn	2021-01-28	-4.51074	-2.60602
CVU_carb_5272	71620		6261	0	6261	0	1908.35	36.3563	Sercon 20-22, Penryn	2021-01-28	-4.2241	-2.20164
CVU_carb_5273	71621		6263	0	6263	0	1908.96	59.0926	Sercon 20-22, Penryn	2021-01-28	-4.39487	-2.09463
CVU_carb_5274	71622		6263	9	6263	9	1909.19	75.5985	Sercon 20-22, Penryn	2021-01-28	-4.15011	-1.50723
CVU_carb_5275	71623		6265	0	6265	0	1909.57	44.335	Sercon 20-22, Penryn	2021-01-28	-3.9975	-1.61247
CVU_carb_5276	71624		6265	10	6265	10	1909.83	58.6055	Sercon 20-22, Penryn	2021-01-28	-4.21291	-2.89426
